# 1      **Analysis and culturing of the prototypic crAssphage reveals a** 2      **phage-plasmid lifestyle**

3      Danica T. Schmidtke<sup>1</sup>, Angela S. Hickey<sup>2</sup>, Ivan Liachko<sup>3</sup>, Gavin Sherlock<sup>\*2,6</sup>, Ami S. Bhatt<sup>\*\*2,4,5,6</sup>

4      1. Department of Microbiology and Immunology, Stanford University, Stanford, CA, USA

5      2. Department of Genetics, Stanford University, Stanford, CA, USA

6      3. Phase Genomics, Seattle, WA, USA

7      4. Department of Medicine (Division of Hematology), Stanford University, Stanford, CA,  
8      USA

9      5. Lead corresponding author

10     6. Senior author

11     \*correspondence [gsherloc@stanford.edu](mailto:gsherloc@stanford.edu)

12     \*\*correspondence [asbhatt@stanford.edu](mailto:asbhatt@stanford.edu)

## 13     **Summary**

14             The prototypic crAssphage (*Carjivirus communis*) is one of the most abundant,  
15     prevalent, and persistent gut bacteriophages, yet it remains uncultured and its lifestyle  
16     uncharacterized. For the last decade, crAssphage has escaped plaque-dependent culturing  
17     efforts, leading us to investigate alternative lifestyles that might explain its widespread success.  
18     Through genomic analyses and culturing, we find that crAssphage uses a phage-plasmid  
19     lifestyle to persist extrachromosomally. Plasmid-related genes are more highly expressed than  
20     those implicated in phage maintenance. Leveraging this finding, we use a plaque-free culturing  
21     approach to measure crAssphage replication in culture with *Phocaeicola vulgatus*, *Phocaeicola*  
22     *dorei*, and *Bacteroides stercoris*, revealing a broad host range. We demonstrate that  
23     crAssphage persists with its hosts in culture without causing major cell lysis events or  
24     integrating into host chromosomes. The ability to switch between phage and plasmid lifestyles  
25     within a wide range of hosts contributes to the prolific nature of crAssphage in the human gut  
26     microbiome.

## 27     **Key Words**

28     crAssphage, microbiome, bacteriophage, plasmid, phage-plasmid, *Phocaeicola*, *Bacteroidota*,  
29     *Carjivirus communis*

## 30     **Introduction**

31             Phages, viruses that infect prokaryotes, are among the most abundant genetic entities  
32     on earth, yet until the advent of affordable metagenomic sequencing, only a small number of  
33     human microbiome-related phages were known. Now, DNA viruses are estimated to outnumber  
34     bacteria in the human gut 2:1<sup>1</sup> and certain phages, such as the prototypical crAssphage  
35     (*Carjivirus communis*), are thought to be among the most prevalent and abundant genetic  
36     entities associated with humans<sup>2</sup>. Despite these advances, human associated phages remain  
37     under-characterized and under-cultured despite their importance in shaping both microbial

38 communities and human health<sup>3-7</sup>. Even after over a decade of study, *Carjivirus communis* has  
39 not been successfully propagated and has yet to be isolated in pure culture. Therefore, there is  
40 little understanding of its biology, lifestyle, and the implications of those on human health.

41 Phages in the gut likely impact human health both indirectly, by modulating the  
42 composition of the gut microbiota, and directly, through interactions with mammalian cells<sup>8</sup>.  
43 Phages can manipulate gut bacterial community composition by lysing their bacterial hosts  
44 leading to shifts in community composition that are often correlated with disease states<sup>9-11</sup>.  
45 Furthermore, phages can facilitate horizontal gene transfer between gut bacteria and can  
46 encode virulence factors such as toxins, which allow bacteria to more readily cause disease<sup>8</sup>.  
47 Finally, phages can directly interact with their human superhosts, as they have been shown in  
48 specific cases to transverse the gut epithelial barrier, enter the circulatory system, and inject  
49 their genomes into human cells where, sometimes, phage genomes can be transcribed<sup>12,13</sup>. The  
50 impacts that phages have on their hosts and super hosts are likely related to the phages'  
51 lifestyles.

52 Classically, phages are categorized as either purely lytic or lysogenic. Purely lytic  
53 phages use host machinery to replicate and package their genomes into capsids followed by  
54 cell lysis to release phage progeny, killing their host in the process. By contrast, temperate  
55 phages can integrate into the host genome, only rarely transitioning into a lytic phase. In some  
56 environments, like the ocean, the majority of phages are thought to be lytic<sup>14</sup>. However, with  
57 advances in computational tools<sup>15</sup> increasing the sensitivity of prophage detection, it is now  
58 recognized that the vast majority of phages that reside in the human gut are likely temperate<sup>8</sup>.  
59 Increased bacterial lysis (which can be caused by lytic phages) has been described to trigger  
60 disease states such as inflammation and increased gut permeability<sup>8,13,16-19</sup>. Taken together, the  
61 balance between lysogeny and lysis is likely important in maintaining human health<sup>8,20</sup>. As more  
62 phages are discovered, it is becoming clear that many seemingly "temperate" gut phages do not  
63 encode classical marker genes of temperate lifestyles, such as integrases for integrating into  
64 bacterial genomes<sup>21</sup>. Therefore, alternatives to phage genome integration are likely common in  
65 the gut, allowing phages to persist for long periods as non-integrative lysogens<sup>21</sup>.

66 One mechanism by which phages have evolved a non-integrative lysogenic state is  
67 through the acquisition of plasmid genes. Phage-plasmids (PPs) are large DNA elements (larger  
68 than phage or plasmid alone, >90Kb), that encode phage, plasmid, and accessory genes<sup>22,23</sup>.  
69 Rather than switching between lysis and integration, PPs switch between phage lysis and low-  
70 copy number plasmid replication modes<sup>24</sup>. A recent, large computational analysis showed that  
71 PPs are far more prevalent than previously appreciated, and that ~7% of all sequenced  
72 plasmids and ~5% of phages in the RefSeq database are likely PPs<sup>22</sup>. Even these numbers are  
73 likely gross underestimates of the true prevalence of PPs, because PP detection methods  
74 require searching for plasmid gene annotations in phage genomes and vice versa and gene

75 annotations in phages are rather limited<sup>25</sup>. Due to their lifestyle, which includes (with some  
76 exceptions) recurrent productive infection, the lack of chromosomal integration, and a  
77 decreased propensity for plaque formation, few PPs are culturable<sup>26–31</sup>. Additionally, even  
78 cultured phages or plasmids might escape identification as PPs because one life cycle may  
79 dominate (phage or plasmid) thereby preventing experimental observation of both lifestyles in  
80 culture. Due to the challenges with identifying, culturing, and studying PPs, few PPs have been  
81 cultured or studied in depth, and we have only just begun to understand their prevalence and  
82 diversity.

83 *Carjivirus communis* is infamously difficult to culture, despite its high prevalence and  
84 abundance in the human gut. *C. communis*' 97Kb dsDNA genome was computationally  
85 discovered by metagenomic cross-assembly, and estimates for the global prevalence of *C.*  
86 *communis* are >70% with abundances reaching >90% of publicly available human gut viral-like-  
87 particle sequencing<sup>2,32</sup>. Despite rigorous attempts, *C. communis* is not known to grow on  
88 isolated bacteria, form plaques, integrate into bacterial chromosomes, or encode integration-  
89 related genes<sup>2,33–37</sup>. However, Guerin *et al.* demonstrated that the *Carjivirus* genus can replicate  
90 in a continuous stool culture suggesting that *C. communis* and its bacterial host are both  
91 abundant in stool and culturable<sup>34</sup>. Therefore, we hypothesize that, like PPs, *C. communis* might  
92 use an alternative lysogenic state that does not include integration into the bacterial host  
93 genome.

94 Here, we report the first culturing of *C. communis* on a single host, and classify it as a  
95 phage-plasmid. First, we identify genomic features that are consistent with a PP lifestyle. Next,  
96 we predict *Phocaeicola vulgatus* as a bacterial host for *C. communis* via proximity-ligation  
97 sequencing of *C. communis* containing stool. Through both proximity-ligation sequencing and  
98 long-read sequencing we are unable to observe integration of *C. communis* into bacterial  
99 genomes, but do observe the potential existence of both circular and linear forms of the *C.*  
100 *communis* genome. Given previously failed plaquing attempts, we investigate whether *C.*  
101 *communis* might predominantly exist as a plasmid. Analysis of publicly available  
102 metatranscriptomic data reveals that the *C. communis* plasmid genes are more highly  
103 expressed than phage genes in stool samples, suggesting that the plasmid lifestyle is preferred  
104 in the context of a healthy human gut. We then seek to culture *C. communis* to observe its  
105 growth dynamics. We develop a culturing approach to study *C. communis* and begin to  
106 characterize its phage-plasmid-like lifestyle, that enables targeted phage culturing and does not  
107 necessitate plaque formation. The culturing technique is as follows: 1) identification of phage  
108 containing stool, 2) bacterial host prediction via proximity ligation sequencing, 3) stool-based  
109 culture, 4) harvest phage filtrate from stool-based culture, and 5) liquid culture with the predicted  
110 host. We demonstrate that *C. communis* replicates not only in stool-based culture, but also in  
111 pure *P. vulgatus*, *Phocaeicola dorei* and *Bacteroides stercoris* cultures. Upon culturing *C.*  
112 *communis*, we observe growth dynamics that differ across hosts and a lack of plaque formation.  
113 Taken together, the high expression of plasmid genes, segments of time with stable phage:host  
114 ratios observed in culture, and lack of both integrative lysogeny and plaque formation suggest  
115 that *C. communis* is a phage-plasmid that predominantly exists in plasmid form.

## 116 Results

### 117 Genomic analysis of *Carjivirus communis*

118 Since few PPs are culturable, most knowledge surrounding PPs comes from the in-  
119 depth characterization of one PP, bacteriophage P1<sup>22,24,27,28,38,39</sup>. Given the absence of widely  
120 agreed-upon criteria for defining a PP, we used the key genomic and lifestyle features of P1 as  
121 a benchmark against which to evaluate *Carjivirus communis* as a candidate PP. When P1 is a  
122 phage, it has a linear, double-stranded DNA genome with terminally redundant sequences  
123 whose sequence similarity causes the genome to pseudo-circularize<sup>24,26</sup>. When P1 is a plasmid,  
124 the genome circularizes through a recombinase-mediated process, and it stably exists at one  
125 copy per bacterial chromosome via plasmid addiction with a toxin-antitoxin (TA) system and a  
126 partitioning system (ParA ATPase Walker)<sup>24</sup>. P1 also requires two different origins of replication,  
127 one for each lifestyle. P1 replicates as a circular plasmid from one origin (*oriR*) located within  
128 the replication initiation gene (*repL*) and, less often, induces its lytic cycle and replicates from a  
129 second origin (*oriC*) partially located within a second replication initiation gene (*repA*)<sup>24</sup>. Finally,  
130 P1 is prevalent in the gut, and due to its wide host range, and prolific transduction, it majorly  
131 contributes to horizontal gene transfer across diverse bacteria in the gut<sup>38,40</sup>. Here, we show that  
132 *C. communis*, like P1, is a PP with phage and plasmid gene functions, linear and circular  
133 genome forms, and two origins of replication.

#### 134 *Carjivirus communis* encodes both phage and plasmid genes

135 The *C. communis* genome has two distinct regions with opposing gene orientation and  
136 function<sup>2</sup>. The genes on the positive strand encode genome replication-related functions, while  
137 the reverse strand encodes phage structural and lytic-related genes (Fig. 1A). We were curious  
138 if this division of gene orientation and function permits two *C. communis* lifestyles; one “plasmid”  
139 and one “phage.” We hypothesized that *C. communis* might encode genes important for a  
140 plasmid lifestyle on the positive strand.

141 While Dutilh *et al.* annotated two plasmid-originating genes in the original *C. communis*  
142 reference genome, these genes have not been further analyzed<sup>2</sup>. These two genes encode  
143 candidate plasmid replication initiation proteins (RepL) (Fig. 1B-C). One *repL* is in the first  
144 position of the positive-strand genes and the other is in the last position, and their protein  
145 sequences are only distantly related to one another (24.6% amino acid identity). The duplication  
146 of *repL* may allow for two origins of replication to regulate between phage and plasmid lifestyles.  
147 The presence of these genes also resulted in the identification of *C. communis* in a large  
148 computational analysis for PPs<sup>22</sup>. However, *C. communis* was the only *Crassvirales* found in the  
149 analysis and did not cluster with any other PPs and was not examined further.

150 Given that *Crassvirales* in general show low rates of integrative lysogeny and yet persist  
151 in the gut and laboratory cultures for long periods, we were curious if the PP lifestyle might be  
152 common across *Crassvirales*. We identified 23 *repL* genes in the genomes of 19 additional  
153 *Crassvirales* genomes (Supplementary Fig. 1). Five of these RepL proteins are encoded in four

154 *Crassvirales* genomes (one copy in four of the genomes, and two copies in one of the genomes)  
155 with >95% nucleotide identity shared across >96% of the *C. communis* genome, while the rest  
156 of the RepLs are in more divergent *Crassvirales* genomes (Supplementary Fig. 1). Due to the  
157 diverse nature of *Crassvirales*, it is possible that *repL*-like genes are more widespread  
158 throughout *Crassvirales* genomes, but their sequences are too divergent to be easily identified.

159 While the presence of *repL* is strong evidence for a PP lifestyle, we nonetheless looked  
160 for other plasmid-like genes within the *C. communis* genome. To identify such genes we created  
161 a custom BLAST database of plasmid protein sequences and compared the *C. communis*  
162 protein sequences to the custom database<sup>41</sup>. We identified two additional genomic features that  
163 are present in other PPs; a potential TA system and a *mobC* gene (Fig. 1D-F). TA systems  
164 cause plasmid addiction and regulation of plasmid copy number, and the presence of a TA  
165 system in *C. communis* likely contributes to its persistence in the gut<sup>42</sup>. MobC allows plasmids to  
166 mobilize by hitchhiking through existing conjugative structures<sup>43</sup>. MobC is part of the relaxosome  
167 which binds the origin of transfer, melts the DNA, creates a single-stranded nick, and pulls the  
168 ssDNA into the new cell where it is then ligated into circular ssDNA and replicated to become  
169 dsDNA again<sup>43-45</sup>. In further support of this gene annotation, there is a previously annotated  
170 DNA ligase directly next to the predicted *mobC* gene (Fig. 1A). While we could not identify  
171 homology between this DNA ligase and other *mob* genes, it may function like MobA, another  
172 component of the relaxosome that has DNA ligase capabilities<sup>43</sup>.

173 Finally, two previously identified genes, a uracil-DNA glycosylase and a host nuclease  
174 inhibitor are likely implicated in anti-phage defense<sup>46-51</sup>. The presence of these genes also  
175 points towards a PP lifestyle since PPs tend to have larger genomes and encode more  
176 accessory functions such as a wide repertoire of counter mechanisms to bacterial-encoded  
177 phage defense and plasmid TA systems<sup>22,39,52</sup>.

## 178 **Bacterial host prediction for *Carjivirus communis* via proximity ligation sequencing**

179 Given that PPs tend to exist as circular extrachromosomal elements, we first wanted to  
180 determine if *C. communis* is an integrative prophage or is maintained extrachromosomally. To  
181 search for *C. communis* integration into its bacterial host, we first had to determine a potential  
182 bacterial host. However, using strictly computational methods to predict the bacterial host(s) of  
183 phages within complex microbial communities is difficult, tends to have low accuracy, and does  
184 not always produce species-level predictions<sup>53</sup>. There are many computational tools for phage-  
185 host prediction, but most computational predictions have not been experimentally validated and  
186 tend to show inconsistencies across methods<sup>53,54</sup>. Additionally, most computational host  
187 prediction methods rely on assumptions that are not universally true, such as: GC content or  
188 methylation pattern matches between phage and their hosts, sequence matches to existing  
189 databases, phage integration into host genomes, and matched codon usage between phages  
190 and their hosts<sup>53,54</sup>. Previous computational host predictions largely agree that the host of *C.*  
191 *communis* is within the phylum *Bacteroidota* (Table 1), yet there is no obvious agreement as to

192 which species may serve as a *C. communis* host. These inconsistencies in host predictions  
193 likely arise because most previous prediction methods were strictly computational and have low  
194 accuracy. It is also likely that the success of *C. communis* in the gut may be attributed to a wide  
195 host range and host predictions may never agree on a single bacterial host.

196 An alternative approach for phage-host identification, which has been shown to be quite  
197 accurate, is metagenomics proximity-ligation sequencing<sup>55,56,56–61</sup>. This technique captures  
198 phage-bacterial chromosome interactions in three-dimensional space, enabling the identification  
199 of phage genomes and bacterial genomes that are in very close physical proximity to one  
200 another (i.e., in the same cell; Fig. 2A). Specifically, the proximity of the bacterial and  
201 bacteriophage genomes enables crosslinking and ligation between the molecules, which then  
202 produces chimeric bacteria-phage DNA molecules that can be quantified as evidence of co-  
203 localization within a cell (Fig. 2A).

204 We thus applied ProxiMeta Hi-C for the identification of a candidate *C. communis*  
205 bacterial host. To identify a *C. communis* containing stool sample we analyzed previously  
206 published shotgun metagenomic sequencing data (for which we had matched stool) for the  
207 presence of *C. communis*<sup>62</sup>. For one sample, we found that 11.5% of the shotgun metagenomic  
208 reads mapped to the *C. communis* reference genome. We found that the *C. communis* genome  
209 was linked to *Phocaeicola vulgatus* more than expected by chance for a metagenome  
210 assembled genome (MAG) of its abundance (Fig. 2B). As a negative control, we also mapped  
211 the links between *C. communis* and two other MAGs present in the sample but not predicted as  
212 hosts (*Parabacteroides merdae* and *Bacteroides stercoris*). The observed links between *C.*  
213 *communis* and these two bacteria were much lower frequency than the internal links for each  
214 bacterial genome (Supplementary Fig. 2). By contrast, the frequency of links between *P.*  
215 *vulgatus* and *C. communis* was comparable to the internal *P. vulgatus* links (Supplementary Fig.  
216 2), suggesting the links do not occur by chance. Importantly, our host prediction agrees with the  
217 only other experimental host prediction method that has been used for *C. communis* (single-cell  
218 microbiome sequencing)<sup>63</sup> (Table 1).

## 219 **Bacterial host prediction for *Carjivirus communis* via CRISPR spacer analysis and gene** 220 **homology**

221 We additionally used CRISPR spacer analysis and phage-bacteria gene homology to  
222 predict a potential bacterial host for *C. communis*. PHISdetector<sup>64</sup> revealed two perfect spacer  
223 matches in the *C. communis* reference genome, one to *P. vulgatus* and a second to  
224 *Parabacteroides distasonis* (Fig. 2C). Finally, the exchange of genetic material between phages  
225 and their bacterial hosts is common, and therefore searching for genes of bacterial origin within  
226 phage genomes can also point towards phage-host associations. One previously identified gene  
227 in *C. communis* is particularly suited for this task. A *Bacteroides*-Associated Carbohydrate-  
228 binding Often N-terminal (BACON) domain-containing protein was previously annotated in *C.*  
229 *communis* and is commonly encoded in *Bacteroidota* species<sup>65</sup>. Therefore, this sequence likely

230 originated from a bacterium that *C. communis* previously infected. We determined that the *C.*  
231 *communis* reference BACON protein sequence was most closely related to proteins in other  
232 *Crassvirales*, followed by *P. vulgatus*, *P. dorei*, and *B. uniformis* (Fig. 2D). Synthesizing the  
233 results of these three orthogonal phage-host prediction methods, as well as the previous  
234 predictions from the literature, we predict that *P. vulgatus* is highly likely to serve as a host for *C.*  
235 *communis*, though it may not serve as the sole host.

### 236 ***Carjivirus communis* does not integrate into bacterial genomes**

237 With a predominant bacterial host predicted, we sought to identify integration events of  
238 *C. communis* in its host. Therefore, we mapped the locations of the links between *C. communis*  
239 and *P. vulgatus* across the genomes (Fig. 3A) with the expectation that a random or even  
240 distribution across *P. vulgatus* suggests no integration, while a high density of links in one  
241 location would suggest *C. communis* integration at that location. We found an even distribution  
242 of links across the *P. vulgatus* genome suggesting a lack of integration of the phage into the  
243 bacterial genome (Supplementary Fig. 3).

244 Additionally, we analyzed long-read Oxford Nanopore sequencing of a *C. communis*  
245 positive stool for signatures of prophage integration. We identified reads that mapped to the *C.*  
246 *communis* reference genome and extracted soft-clipped read regions from those reads that had  
247 them. Extracted soft-clipped regions were then aligned back to the *C. communis* genome  
248 assembled from the sequenced sample: 99.9% (of 92,394 total) of the soft-clipped regions  
249 aligned directly back to *C. communis*, and the soft-clipped regions of only 18 reads remained  
250 unmapped. Of these, 12 had direct BLAST hits to or aligned to assembled contigs with hits to  
251 *Crassvirales* genomes, and the remaining 6 had no similarity to sequences in the database, and  
252 did not map to any assembled contigs from the sequencing; it is therefore unlikely that *C.*  
253 *communis* is integrated into any bacterial genomes in this dataset. These findings are consistent  
254 with prior efforts that also failed to find any evidence of *C. communis* integrative-prophages or  
255 lysogenic genes and observed overall very low rates of *Crassvirales* lysogeny compared to  
256 other gut phages<sup>2,36</sup>.

### 257 ***Carjivirus communis* exists as both a circular and a linear extrachromosomal element**

258 Given that *C. communis* likely does not exist as an integrated lysogen, we sought to  
259 determine if it might be maintained extrachromosomally as a non-integrative lysogen. We  
260 hypothesized that *C. communis* predominantly exists as an extrachromosomal, circular plasmid,  
261 and less often as a linear phage, similar to P1<sup>24</sup>. First, we examined the ProxiMeta Hi-C data for  
262 interactions within the *C. communis* genome (Fig. 3B). The *C. communis* interaction map  
263 suggests predominantly standard, local interactions of a circular genome<sup>66</sup>. However, it also  
264 demonstrates global interactions between one segment of the genome and all of the other loci.  
265 A possible explanation for this observation is that if a linear version of the genome exists, the  
266 ends are more likely to partake in global interactions with the rest of the genome due to the

267 increased bending of linear DNA allowing these interactions to take place more easily in three-  
268 dimensional space<sup>67</sup>.

269 Using previously established methods for phage genome terminus identification, we  
270 aligned our short read sequencing reads to our *C. communis* genome assembly and looked for  
271 regions of higher coverage (~2x) which might suggest direct terminal repeats (DTRs) (Fig.  
272 3C)<sup>68</sup>. We identified a region of high coverage in the same region of the genome that partakes in  
273 global genome interactions. Finally, we searched for read ends, and also identified a higher  
274 abundance of read ends at the global interaction region suggesting that the genome exists  
275 linearly (Fig. 3D). These data support the prior speculation that the genome may exist in two  
276 forms; linear with DTRs, and circular<sup>69</sup>. Additionally, *C. communis* encodes a RecT recombinase  
277 that might mediate the transition from a linear to a circular genome (Fig. 1A).

### 278 ***Carjivirus communis* encodes two origins of replication**

279 The model phage plasmid P1 encodes two bidirectional origins of replication, one for  
280 plasmid replication initiation and one for lytic phage replication initiation, therefore we asked  
281 how *C. communis* might initiate replication<sup>24,70</sup>. Since *C. communis* encodes two RepLs we  
282 hypothesized that one RepL acts as an initiation factor for phage replication and the other other  
283 for plasmid replication. We used OriFinder<sup>71</sup> to computationally predict an origin of replication in  
284 *C. communis*. OriFinder predicted a potential origin directly upstream of the *repL* at the  
285 beginning of the forward strand (Fig. 4A). RepL binds to an origin of replication, which in P1 is  
286 within the *repL* gene, to initiate genome replication. Therefore, the proximity of the *repL* gene  
287 and the predicted origin is supportive of the predicted origin location<sup>24</sup>. Additionally, OriFinder  
288 predicted a second potential origin ~2,600 bp downstream of the other origin and directly  
289 downstream of the TA system. The TA system in P1 regulates plasmid copy number via  
290 competitive binding inhibition, and overproduction of the antitoxin allows it to bind to the origin in  
291 place of the replication initiation protein thereby inhibiting replication in a feedback loop to keep  
292 plasmid copy number under control.

293 The previously reported GC skew of the genome also supports the presence of both of  
294 these origins<sup>72</sup>. There is a stark shift in GC skew between the forward and reverse strands for  
295 the *C. communis* reference due to the perfect gene orientation coordination between the two  
296 strands. However, similar to the P1 genome, the GC skew between the two potential origins is  
297 close to zero<sup>24</sup> (Fig. 4B).

298 Finally, we sought experimental evidence to explore whether the origins of replication  
299 might exist at the predicted region. Because replication firing at the origin is typically associated  
300 with a higher total copy number of DNA at the origin compared to the terminus or other parts of  
301 the genome, sequencing coverage is a potential readout for the origin location. The expectation  
302 is that coverage is the highest at the origin of replication and declines with distance from the  
303 origin. Therefore, we analyzed the coverage of the *C. communis* genome in long-read Oxford  
304 Nanopore sequencing, which shows higher coverage near the predicted origins of replication



305 which declines further away from these loci (Fig. 4C). We conclude that *C. communis* likely uses  
306 two origins of replication similar to P1. P1 replicates bidirectionally from oriL early in its lytic  
307 phase, later transitioning to rolling circle replication thereby producing long linear concatemers  
308 of the genome. These concatemers are processed and packaged into phage heads as linear  
309 genomes with DTRs<sup>24,70</sup>. Once the phage infects a bacterial cell the P1 genome is circularized  
310 via recombination between DTRs and replicates as a plasmid from oriR until it again undergoes  
311 lytic replication<sup>24,70</sup>. Given the increasing evidence supporting the existence of both a phage and  
312 plasmid lifestyle for *C. communis*, and the lack of plaque formation or major lysis events, we  
313 investigated whether *C. communis* exists predominantly in a plasmid lifestyle.

### 314 **Plasmid genes are more highly expressed than phage genes in *Carjivirus communis***

315 To determine whether the phage or the plasmid genomic 'program' dominates when *C.*  
316 *communis* is in the human gut, we analyzed publicly available, paired stool metatranscriptomic  
317 and metagenomic data<sup>73</sup>. We identified 111 metatranscriptomic samples with >1x coverage of  
318 the *C. communis* genome. We calculated the mean expression for each individual gene in the  
319 *C. communis* genome across the 111 samples and found that genes on the forward (plasmid)  
320 strand had higher expression on average across all samples than those on the reverse (phage)  
321 strand (Fig. 5A). Next, we calculated the ratio of average positive stranded gene expression to  
322 negative stranded gene expression in each of the individual 111 samples. We found that the  
323 positive:negative ratio was >1 in 95/111 (85.6%) analyzed samples (Fig. 5B) suggesting that  
324 plasmid genes are more highly expressed in the majority of samples evaluated.

325 Finally, we examined the expression of *C. communis* genes across many samples. We  
326 looked for genes expressed in at least 105 of the 111 samples (~95%). We found that genes  
327 encoding single-stranded binding proteins were the most often expressed (Single stranded  
328 binding protein 1 = 110/111, Single stranded binding protein 2 = 109/111) and were expressed  
329 at the highest average levels. The other genes expressed in the largest number of samples  
330 were a recombinase, RecT (110/111), SF1 helicase (109/111), ATPase walker motif (105/111),  
331 RNAP (105/111), and major capsid (105/111) (Supplementary Fig. 4, Supplementary Table 1).  
332 Interestingly, many of these genes are likely important in plasmid replication and concatemer  
333 resolution<sup>24</sup>. However, the major capsid is also expressed in many samples suggesting the  
334 production of phage particles. In addition to the major capsid, despite the lack of plaque  
335 formation by *C. communis*, we do observe expression of cell lysis and other structural genes  
336 suggesting that *C. communis* not only forms viral particles but also lyses out of bacterial cells  
337 under at least some circumstances.

### 338 **Targeted, plaque-free culturing of *C. communis***

339 *C. communis* has been heavily studied via computational analyses; however, further  
340 investigation into its biology requires culturing it in the laboratory. While we find supporting  
341 computational evidence that *C. communis* follows a PP lifestyle, we wanted to see if we could

342 culture *C. communis* and observe PP-like growth dynamics. Therefore, we developed a plaque-  
343 independent culturing method that is well-suited for PP culturing. Additionally, phage culturing  
344 techniques typically entail isolation of many phages on a single bacterial host, rather than  
345 targeted isolation of a specific phage, and our culturing method allows targeted culturing of *C.*  
346 *communis*. The culturing technique includes: 1) identification of *C. communis* positive stool, 2)  
347 bacterial host prediction using ProxiMeta Hi-C, 3) stool-based culture, 4) harvesting phage  
348 filtrate from stool-based culture, and 5) liquid culture of *C. communis* with the predicted host.

### 349 **Identification of a *Carjivirus communis* strain in a stool sample**

350 To culture the phage, we first needed to identify a reservoir from which we could  
351 replicate it. Given that the *Carjivirus* genus can replicate in continuous stool culture, we decided  
352 to use stool as a culturing source<sup>34</sup>. Mapping of metagenomic sequencing reads to the *C.*  
353 *communis* reference genome suggests a high abundance of a *C. communis* relative in the  
354 human stool sample on which we performed ProxiMeta Hi-C. To determine how closely the  
355 phage in this sample was related to the *C. communis* cross-assembled reference, we generated  
356 a complete genome using standard shotgun as well as ProxiMeta-Hi-C sequencing data for this  
357 stool sample. We compared our assembly to the *C. communis* reference genome and found  
358 that they are 95.5% identical (average nucleotide identity) over their entire lengths (Fig. 6),  
359 confirming that they are the same species<sup>74,75</sup>.

360 When comparing two distinct regions in the *C. communis* genome, separated by  
361 opposing gene orientation and coordinated function, we observed that the forward-stranded  
362 genes implicated in genome replication were overall less conserved (90.1% nucleotide identity)  
363 than the reverse strand implicated in phage particle production and cell lysis (97.5% nucleotide  
364 identity) between the *C. communis* reference genome and our assembly (Fig. 6). This  
365 observation is consistent with findings that phage genes are more highly conserved than their  
366 plasmid counterparts in PP genomes<sup>22</sup>. This suggests that while they may predominantly exist  
367 as plasmids, phage genes are likely not in the process of pseudogenizing.

368 Finally, we compared our assembled *C. communis* genome to the genomes of all  
369 previously cultured *Crassvirales* via whole genome alignment, construction of a phylogenetic  
370 tree, and generation of synteny plots to visualize similarities in gene organization (Fig. 6).  
371 Together, these data show that our assembly is a closer relative to *C. communis* than other  
372 cultured *Crassvirales* thus far. Having identified a stool sample with a strain of *C. communis*,  
373 and a potential bacterial host, *P. vulgatus*, we wanted to measure *C. communis* replication in  
374 relation to *P. vulgatus* in stool-based culture and observe phage-host growth dynamics

### 375 **Plaque-independent measurement of phage replication in stool-based culture**

376 We sought to obtain a high-titer stock of the phage to then harvest and test for  
377 replication on the predicted bacterial host. Since it was previously reported that other phages in  
378 the *Carjivirus* genus can replicate in continuous stool culture, we first attempted to replicate *C.*

379 *communis* to high titers in stool-based culture as a reservoir for further culturing<sup>33,34</sup>. However,  
380 since continuous culture systems are highly resource-intensive, we employed a non-continuous,  
381 batch culture system. We anaerobically cultured the *C. communis* positive stool sample  
382 identified above, alongside a second *C. communis* negative stool sample for which 0 shotgun  
383 sequencing reads mapped to the *C. communis* genome. Previous work found that the presence  
384 of kanamycin and vancomycin enriches for *Bacteroidota* and enhanced replication of the  
385 *Carjivirus* genus<sup>34</sup>. Therefore, we diluted our two stool samples into TSB media containing  
386 vancomycin and kanamycin and sampled the cultures every 4 hours across a 44-hour culture.

387 At each time point, we measured the OD600 of the culture (Fig. 7A) and observed robust  
388 growth of both stool samples. Additionally, since we could not recover *C. communis* plaques, we  
389 used qPCR to determine the copies of both the *C. communis* genome over time in the culture  
390 (Fig. 7B). Since the stool culture was a complex mixed community of bacteria, it was not  
391 possible to determine the abundance of the predicted bacterial host of *C. communis* (*P.*  
392 *vulgatus*) by colony-forming units (CFU), and we thus also measured genome copies of *P.*  
393 *vulgatus* via qPCR over time in the culture (Fig. 7B). We observed that the *C. communis*:*P.*  
394 *vulgatus* ratio settles around ~1:1 from 24 to 32 hours followed by a ~1.5 log increase in *C.*  
395 *communis* copies and an increasing *C. communis*:*P. vulgatus* ratio. A 1:1 ratio suggests either  
396 integration into a host genome, or extrachromosomal maintenance at a consistent copy number  
397 ( $n=1$ ) per cell, like a plasmid. Since we do not observe any evidence of *C. communis* forming  
398 integrative lysogens, it likely exists as a plasmid.

### 399 **Experimental validation of *P. vulgatus* as a host for *C. communis***

400 Having demonstrated that *C. communis* can replicate in stool-based culture, we next  
401 sought to determine whether *C. communis* could 1) replicate on its predicted host, *P. vulgatus*,  
402 and 2) if it has similar growth dynamics in *P. vulgatus* pure culture as in stool culture. We first  
403 tested the ability of *C. communis* harvested in the phage filtrate from a fecal culture to plaque on  
404 the type strain *P. vulgatus* 8483 ATCC, as well as a strain that we isolated from stool which is  
405 closely related to *P. vulgatus*, *P. dorei*. Consistent with previously published work, we were  
406 unable to obtain *C. communis* plaques by standard methods<sup>2,33</sup>. Given the inducible nature of  
407 lysogenic phages, we also attempted to induce plaque formation through carbadox, mitomycin  
408 C, UV, and heat treatments, which similarly yielded no plaques on either bacterial species<sup>31,38,39</sup>.  
409 The lack of plaque formation, induction, and the observed ~1:1 phage:host ratio in stool culture  
410 supports our model that *C. communis* might be largely maintained extrachromosomally at a  
411 stable copy number like a plasmid. Therefore, we turned to a liquid culturing approach.

412 We grew either *P. vulgatus* or *P. dorei* to mid-logarithmic growth and applied phage  
413 filtrate from the stool culture at roughly a multiplicity of infection (MOI) of 0.1 for *C. communis*.  
414 We sampled the culture every 4 hours over a 44-hour culture measuring the OD600 of the  
415 culture, CFU of the bacteria, and the copies of *C. communis* via qPCR each time point  
416 (Supplementary Fig. 6-9, Fig. 8A-B). In a liquid culture of a lytic phage, our expectation was that

417 as the phage replicated, cells would lyse, and the OD600 of the culture would decline. However,  
418 we did not observe any difference between the OD600 of the bacterial cultures with and without  
419 phage filtrate added, despite the fact that *C. communis* replicated to high titers. We observed  
420 that *C. communis* copies increased by ~1.5 logs when cultured with *P. vulgatus* and ~3 logs  
421 with *P. dorei*.

422 As a negative control, we also added the same amount of phage filtrate to media only, to  
423 ensure that there was no carryover of the bacterial host from stool culture; we observed no  
424 bacterial growth and no significant increase in *C. communis* copies (Supplementary Fig. 6-9).  
425 Additionally, we tested for *C. communis* replication on two bacterial species present in the stool  
426 sample, but not predicted as hosts by ProxiMeta-Hi-C, *Parabacteroides merdae*, and  
427 *Bacteroides stercoris*. We did not observe significant *C. communis* replication in culture with *P.*  
428 *merdae*, but we did observe replication with *B. stercoris* (Supplementary Fig. 6-9). This  
429 suggests that *C. communis* has a wider host range than previously cultured *Crassvirales*, but  
430 that it does not ubiquitously infect all bacterial species in the stool sample that we cultured it  
431 from.

432 The ability of *C. communis* originating from phage filtrate to replicate on an isolated  
433 bacterium suggests that *C. communis* phage particles are produced in fecal culture, despite the  
434 lack of plaques and the observed ~1:1 phage:host ratio in stool culture. This observation might  
435 point towards the ability of *C. communis* to exist in two separate lifestyles. Therefore, we were  
436 curious what the ratios of phage:host were in each culture and if we could observe ratios that  
437 suggest two different lifestyles. We observed different growth dynamics of *C. communis* in the  
438 fecal, *P. vulgatus*, and *P. dorei* cultures (Fig. 8C). Consistent with our findings in stool-based  
439 culture, we observed that when *C. communis* is grown on *P. vulgatus* the ratio of *C. communis*  
440 to *P. vulgatus* is roughly 1:1 from 24 to 32 hours of culture and remains between a 1:1 and 1:10  
441 ratio for the remainder of the culture. In the *P. dorei* culture, we observed a steady increase in  
442 the *C. communis*:*P. dorei* ratio throughout the entirety of the culture. The difference in *C.*  
443 *communis* growth between with *P. vulgatus* vs. *P. dorei* suggests that the copy number of *C.*  
444 *communis* is not as well regulated in *P. dorei* as *P. vulgatus*. This might be attributable to the  
445 predicted TA system. If the TA system is adapted for growth on *P. vulgatus* but not adapted to  
446 *P. dorei*, *C. communis* might be able to reach higher copy numbers in individual *P. dorei* cells.  
447 The TA system may also drive *C. communis* to infect a high percentage of the total bacterial  
448 population through its plasmid addiction mechanism. However, in analyzing phage:host ratios  
449 we could not make conclusions about the percent of the bacteria that are infected at any given  
450 time point and therefore could not definitively conclude that there are two distinct lifestyles  
451 taking place.

452 To further explore the percentage of infected bacterial cells at any given time, and how  
453 many copies of *C. communis* might be present per cell, we analyzed publicly available single-  
454 cell microbiome sequencing data<sup>63</sup>. 14 single-amplified genomes (SAGs) of *P. vulgatus* were  
455 previously identified as *C. communis* positive. Thus, in these 14 samples, we determined the

456 difference in coverage across the *C. communis* genome versus each *P. vulgatus* SAG as a  
457 readout for the copies of phage per bacterial cell (Fig. 8D). We found that there was a median  
458 ~10:1 coverage of *Carjivirus communis:P. vulgatus* in the 14 samples, although 12 of these data  
459 range from ~5-20 copies per cell, and there are two outliers. This is the same ratio observed at  
460 the final two time points in the *P. vulgatus* culture suggesting the possibility that 100% of cells  
461 are infected at this time point with roughly 10 copies of *C. communis* each. By contrast, two of  
462 the single cells had substantially higher copies of *C. communis*, >200 and ~60, suggesting that  
463 *C. communis* may be in a phage-like lifestyle in these cells and that the burst size of *C.*  
464 *communis* may be ~60-200 copies of phage per bacterial lysis event. Consistent with our single-  
465 cell analysis for *C. communis*, the burst size estimates for other cultured *Crassvirales* are ~20-  
466 160 viral particles per cell<sup>76</sup>. One limitation to consider when interpreting these data is that often  
467 SAGs are generated through rolling circle amplification, which has been described to more  
468 efficiently amplify small circular DNA compared to larger circles or linear DNA<sup>77</sup>. Combining the  
469 evidence above, we conclude that *C. communis* may be capable of existing in two different  
470 lifestyles, one in which it maintains stable copy number as a plasmid and one in which it  
471 produces phage particles and lyses out of cells.

## 472 Discussion

473 The 2014 discovery of *C. communis* led to the classification of a large, diverse,  
474 ubiquitous, and persistent order of phages, the *Crassvirales*<sup>78</sup>. *Crassvirales* are among the most  
475 heavily studied gut phages due to their incredible abundance and persistence in the human  
476 gut<sup>34,35,37,79,80</sup>. Estimates suggest that *Crassvirales* comprise > 86% of all gut phages, and *C.*  
477 *communis* alone comprises >40%<sup>78</sup>. In addition to their high abundance, *Crassvirales* are also  
478 persistent. *Crassvirales* can stably persist for long periods in the healthy human gut (>4 years),  
479 human gut post fecal microbiota transplants (>1 year), and cultures in the lab within a single  
480 bacterial host (>21 days)<sup>21,34,72,76,79,81,82</sup>. In lab culture, *Kehishuvirus primarius* (crAss001), the  
481 first cultured *Crassvirales*, is thought to exist in a carrier state infection, where fully formed phage  
482 particles are thought to be maintained within dividing cells without inducing cell lysis, thereby  
483 allowing its long-term persistence in culture in the absence of integrative lysogeny<sup>76</sup>.  
484 Additionally, DNA inversion of promoter sequences in the bacterial hosts of *Crassvirales*  
485 impacts the bacterial susceptibility to phage infection and dramatically reduces the ability of  
486 these phages to both persist and plaque<sup>34,35,76</sup>. Promoter inversion allows constant  
487 replenishment of resistant bacterial subpopulations via varied expression of cell surface  
488 structures implicated in the phage-bacterial binding interface. While the fact that only a small  
489 percentage of the bacteria population may be susceptible to phage receptor binding at any  
490 given time might be one possible explanation for the overall low efficiency of plaquing of the  
491 *Crassvirales*, we propose that non-integrative plasmid-like lysogeny might offer an alternative  
492 explanation. We hypothesize that plasmid lifestyles contribute to long-term persistence and low  
493 levels of host lysis as well as providing an escape to phase variable surface structures by  
494 eliminating the need to bind to them altogether.

495           The fact that *C. communis* does not plaque readily and in liquid culture does not seem to  
496 induce a growth defect in its host may suggest that it is in the process of losing its phage  
497 functions or that it maintains incredibly strict control over its lytic “on switch.” It is thought that  
498 PPs can lose their phage functions altogether once they obtain mobilization genes and an origin  
499 of transfer as an alternative method of horizontal transfer<sup>83</sup>. This could simply be due to genetic  
500 drift and pseudogenization of phage genes, or more likely due to the fact that PP genomes are  
501 larger than those of integrative phages and larger genome size leads to reduced efficiency of  
502 genome packaging into phage particles and a single large genetic acquisition event may inhibit  
503 packaging altogether<sup>22,84</sup>. *C. communis* does encode *mobC*, a mobilization gene, that when  
504 used with conjugative machinery encoded in the chromosome or another mobile element may  
505 enable cell-to-cell transfer of the PP genome without going through a lytic phase. This is one  
506 possible explanation for the lack of *C. communis* plaque formation observed. However, our  
507 results indicate that *C. communis* primarily replicates as a plasmid in the human gut, but phage-  
508 related functions are still transcribed. Our data supports a model in which *C. communis* primarily  
509 replicates as a plasmid, and uses a genetic switch to only lyse out of cells when its survival is  
510 threatened by its host population dwindling or when its bacterial host is under undue stress. We  
511 wonder if many *Crassvirales* are PPs and if this may explain the historical difficulty in culturing  
512 them and sampling their diversity.

513           Despite large culturing efforts, only eight *Crassvirales* of the >700 computationally  
514 identified *Crassvirales* genomes available in NCBI have been cultured, and of these, six form  
515 plaques and are therefore likely not representative of the *C. communis* lifecycle<sup>34,35,37,79,80</sup>. Two  
516 cultured *Crassvirales*, *Jahgtovirus secundus* (crAss002) and the unclassified “C4”, do not form  
517 plaques and thus studying them requires enrichment in liquid culture, which is resource-  
518 intensive and makes uncovering their biology difficult<sup>34,79</sup>. While *J. secundus* persists in culture  
519 with its host, C4 biology is unknown and the studies of these two phages are limited, due to the  
520 laborious nature of culturing them<sup>34,79</sup>. Additionally, while these phages might be closer in  
521 lifestyle to the *C. communis* than the other cultured *Crassvirales*, no phages from the *C.*  
522 *communis* species or even the *Carjivirus* genus had been cultured prior to this study. With  
523 phage-targeted, plaque-free culturing approaches, we can start to bridge the gap between the  
524 computational discovery of novel viral genomes and the experimental characterization of their  
525 novel lifestyles. In this study, we demonstrate that targeted, plaque-free culturing can capture a  
526 PP, and we hypothesize that our method could also be used to culture other non-integrative  
527 lysogens and non-plaquiring phages.

528           PPs are prolific agents of horizontal gene transfer, including implications in the spread of  
529 antibiotic resistance<sup>39,85</sup>. The spread of genetic content between bacteria within the gut may  
530 have dramatic effects on human health in terms of increased bacterial virulence, persistence,  
531 and antibiotic resistance<sup>85,86</sup>. Due to their higher levels of accessory genes and larger genomes  
532 there is more room for genome plasticity and genetic exchange without disrupting essential  
533 gene functions in PPs. PPs are also less drastically impacted by disruption of essential genes  
534 for one genetic program (phage or plasmid) because the alternate program may remain intact.

535 In fact, transposable elements have been shown to frequently jump between PPs and  
536 plasmids<sup>83</sup>. These transposition events can catalyze the transition of one element type to  
537 another (plasmid to PP, PP to plasmid, PP to integrative phage, etc.)<sup>83</sup>. This raises a series of  
538 interesting questions that remain unexplored; how often are these transitions occurring? Is the  
539 frequency of these transitions driven by the fact that one lifestyle is more fit than another in the  
540 human gut? Is a non-integrative plasmid lysogen more fit than an integrative lysogen? While  
541 plasmids may be challenged by plasmid incompatibility, they can also be maintained at multiple  
542 copies per cell and their genes are more highly expressed than integrative lysogens that can  
543 only exist at one copy per cell and are often subjected to gene silencing, inactivation, and  
544 pseudogenization. However, integrative lysogens can more easily evade bacterial defense  
545 systems than extrachromosomal elements. More in depth study of these topics is required to  
546 understand the fitness advantages and disadvantages of each lifestyle type and the transitions  
547 between them.

548 Our study has several limitations. First, in the absence of plaque formation, obtaining a  
549 pure isolated stock of *C. communis* was not possible. Therefore, some of the growth dynamics  
550 we observe may be confounded by the replication of other phages in the cultures. Regardless,  
551 we do not observe detectable host lysis by OD600 and only observe minimal lysis by CFU on *P.*  
552 *vulgatus* and none on *P. dorei*, therefore lysis by additional phages in the culture is negligible.  
553 Second, while we did not observe plaque formation, it is possible that we simply were unable to  
554 identify the lytic trigger of *C. communis*, and that it is indeed capable of frequent and major lysis  
555 events. Given that excessive bacterial cell lysis can lead to disease states and inflammation,  
556 understanding the triggers of *C. communis* cell lysis may have large implications on human  
557 health<sup>8,20</sup>. However, the idea that *C. communis* predominantly replicates as a plasmid suggests  
558 that *C. communis* does not often impact human health through large shifts in microbial  
559 community composition via cell lysis in the absence of a lytic trigger. Further research in this  
560 area is required.

561 This study provides the first experimentally-backed insights into the biology and lifestyle  
562 of one of the most abundant and prevalent gut phages, for which we have very little  
563 understanding of its implications for human health. Many previous studies have attempted to  
564 correlate *C. communis* with different disease states, however in the absence of a confirmed  
565 bacterial host it was previously impossible to determine coordinated changes in phage and  
566 bacterial host abundance<sup>87-91</sup>. Generally, searches for phage-bacteria correlations rely on the  
567 assumption that replication of the phage is detrimental to its host. However, existence as a  
568 plasmid might allow *C. communis* to provide its bacterial host with fitness benefits, thereby  
569 shaping the microbial community composition via promoting cell growth rather than cell death.  
570 Further studies of *C. communis* are needed to gain an understanding of the complex  
571 relationship that it shares with both its microbial and human hosts.

## 572 **Acknowledgements**

573 We thank Dylan Maghini for sharing Oxford Nanopore data, Jakob Wirbel for sharing his  
574 computational expertise, Michelle Hays for thoughtful discussions and experimental expertise,  
575 and Aravind Natarajan for thoughtful discussions on experimental design.

576 G.S. was supported by R35 GM131824. D.T.S. and A.S.H. were supported by the National  
577 Science Foundation Graduate Research Fellowship Program (DGE-1656518). D.T.S. was also  
578 supported by the Cell and Molecular Biology Training Grant (T32 GM007276). I.L. was  
579 supported in part by grants from NIAID (R44 AI172703, R44 AI162570) and a grant from the Bill  
580 & Melinda Gates Foundation. A.S.B. was supported by National Institutes of Health R01  
581 AI148623, R01 AI143757, a Distinguished Investigator Award from the Paul Allen Foundation  
582 and the Stand Up 2 Cancer Foundation. Computing costs were supported, in part, by a NIH S10  
583 Shared Instrumentation Grant S10 OD02014101.

## 584 **Author Contributions**

585 D.T.S, A.S.B, and G.S. conceptualized the study. D.T.S. and A.S.H. performed all experiments;  
586 culturing of stool and isolation bacteria, qPCR. I.L. advised on ProxiMeta Hi-C sequencing and  
587 subsequent analysis. D.T.S. performed all computational analyses. D.T.S., G.S., and A.S.B  
588 wrote this manuscript with input from all authors.

## 589 **Declaration of Interests**

590 I.L. is an employee and shareholder of Phase Genomics, Inc, who commercializes proximity  
591 ligation technology. D.T.S, A.S.H, G.S., and A.S.B declare no competing interests.

## 592 **Methods**

### 593 **Identification of other genes with plasmid origin in the *C. communis* genome (TA system 594 and *mobC*)**

595 To identify plasmid-like genes in the *C. communis* genome, we created a custom BLAST  
596 database of protein genes by downloading all of the protein sequences from plasmids in NCBI.  
597 Protein sequences from the *C. communis* reference genome (NCBI NC\_067194) were  
598 compared against the custom database by running the command line version of blastp<sup>92</sup>. Hits  
599 were filtered for at least 50% query coverage and 25% identity. Hits that met this threshold were  
600 then aligned to their top blastp hit and a few additional related sequences using Geneious  
601 (Geneious, Muscle, and Clustal Omega alignment tools) (Geneious Prime 2023.2.1). If query  
602 sequences were less than 60% of the length of their closest hit, or vice versa, they were not  
603 considered.

### 604 **Identification of *repL* genes in other *Crassvirales***

605 To identify potential *repL* genes in other *Crassvirales* genomes, we used the Repl Pfam profile  
606 (PF01719) and searched all downloaded from NCBI using hmmsearch in HMMER 3.4<sup>93</sup>.



607 Genomes from which identified proteins originated were blasted against the NCBI non-  
608 redundant protein sequences (nr) database to determine the similarity to other *Crassvirales*.

### 609 **Identifying *C. communis* containing stool**

610 Stool previously sequenced via the shotgun illumina platform with paired 150bp reads was  
611 analyzed, and is available on SRA with the bioproject number PRJNA707487<sup>62</sup>. Kraken2<sup>94</sup> was  
612 used for read classification using a custom database as previously described in<sup>62</sup> and samples  
613 were first filtered by presence of the *Carjivirus* genus (>1% of reads classified). In samples with  
614 a high percentage of the *Carjivirus* genus, Bowtie2 2.5.4<sup>95,96</sup> was used to align reads to the *C.*  
615 *communis* reference genome (NCBI NC\_067194).

### 616 **Meta-Hi-C sequencing of *C. communis* containing stool and assembly of the *C.*** 617 ***communis* genome**

618 Meta-Hi-C sequencing was performed using the ProxiMeta kit provided by Phase Genomics  
619 exactly as directed in the standard protocol. 150 bp paired end reads were generated (Novaseq  
620 Illumina) as suggested by Phase Genomics' protocols. The Phase Genomics computational  
621 ProxiMeta pipeline was used for assembly of the *C. communis* genome.

### 622 **Identification of bacterial host in meta-Hi-C sequencing and generation of interaction** 623 **maps**

624 The Phase Genomics computational ProxiMeta pipeline was used for counting chimeric reads  
625 between *C. communis* and bacterial assemblies from the sample. Hi-C interaction maps were  
626 generated with distiller default settings<sup>97</sup>. Plots were visualized using python cooltools<sup>98</sup> and  
627 matplotlib<sup>99</sup>.

### 628 **Computational host prediction via BACON homology and CRISPR spacer analysis**

629 BACON domain homology searching was performed by BLASTing the translated sequence of  
630 the BACON domain containing protein sequence from the *C. communis* reference genome with  
631 blastp<sup>92</sup>. The tree file was downloaded from the BLAST results and the tree was built using  
632 ggtree in Rstudio<sup>100</sup>. CRISPR spacer analysis was performed using Phisdetector<sup>64</sup>.

### 633 **Oxford Nanopore sequencing of *C. communis* containing stool**

634 Oxford Nanopore libraries were prepared with Oxford Nanopore ligation sequencing kit SQK-  
635 LSK109 and sequenced on one FLO-MIN106 flow cell. Reads were assembled with Lathe  
636 v1.0<sup>101</sup>; briefly, reads were basecalled then assembled into contigs with Canu<sup>102</sup>, and contigs  
637 were polished with short reads<sup>103</sup>.

### 638 **Analysis of Oxford Nanopore sequencing for *C. communis* integration events**

639 Oxford Nanopore sequencing reads and assembled contigs were mapped to the *C. communis*  
640 reference genome using minimap2 2.26-r1175<sup>104</sup>. Regions of clipped reads were extracted

641 using samtools v1.19<sup>105</sup> and aligned back to the *C. communis* assembled contig using minimap2  
642 2.26-r1175<sup>104</sup>. Clipped regions that did not align back to the *C. communis* assembly were  
643 BLASTed against the standard nucleotide database (nucleotide collection (nr/nt)) using blastn<sup>92</sup>.

#### 644 **Origin of replication prediction**

645 Origins of replication were predicted with OriFinder-2022<sup>71</sup>. Oxford Nanopore data were mapped  
646 to the *C. communis* reference genome via minimap2 2.26-r1175<sup>104</sup>. GC skew plot was  
647 generated with SkewIT<sup>106</sup>.

#### 648 **Analysis of publicly available metatranscriptomics data**

649 Paired metagenomics and metatranscriptomics data were downloaded from SRA for the  
650 bioproject PRJNA354235<sup>107</sup>. Reads were aligned to the *C. communis* reference genome using  
651 Bowtie2<sup>95</sup>. Samples with at least 300 reads (~1x coverage) aligning to *C. communis* were used  
652 for downstream analyses (n = 111). Bedtools v2.27.1 coverage was used to calculate the  
653 coverage for each gene in the genome<sup>108</sup>. Gene length was determined in kilobases. Per million  
654 scaling factor was determined by dividing the number of reads mapping to *C. communis* by  
655 1,000,000. Next, RPM was calculated; RPM = read counts for a gene / per million scaling factor.  
656 Finally, RPKM was calculated; RPKM = RPM / gene length.

#### 657 **Comparison of *Crassvirales* genomes and generation of synteny plots**

658 To compare the similarity of our *C. communis* assembly to the *C. communis* reference genome  
659 we used the Geneious mapper with default parameters (Geneious Prime 2023.2.1). To compare  
660 the genomes of all of the cultured species of *Crassvirales* we performed whole genome  
661 alignment using Clustal Omega with default settings<sup>109</sup>. From the clustal omega output we  
662 constructed a phylogenetic tree using the Geneious tree builder (Geneious Prime 2023.2.1) with  
663 default parameters. We visualized similarity in gene organization and produced gene plots of  
664 the genomes using AnnoView<sup>110</sup>. Synteny plots were generated using EasyFig 3.0<sup>111</sup>. NCBI  
665 reference numbers of genomes are as follows; *C. communis* NC\_067194, *R. jaberico*  
666 OQ198719, *K. frurule* OQ198718, *K. tikkala* OQ198717, DAC15 NC\_055832, crAss001  
667 NC\_049977, crAss002 MN917146, 14:2 KC821624. C4 genome is not available on NCBI and  
668 was downloaded from the supplement of the paper<sup>79</sup>.

#### 669 **Stool-based culture**

670 1 mg of stool frozen in no preservatives at -80°C was resuspended in 1 mL of Brain heart  
671 infusion (BHI) liquid media. The stool suspension was vigorously vortexed until homogenized.  
672 Homogenized stool resuspension is diluted 1:100 into anaerobic tryptic soy broth (TSB)  
673 containing vancomycin (7.5 µg/ml) and kanamycin (100 µg/mL). The stool was diluted into 50  
674 mL of TSB and cultured at 37°C anaerobically for 44 hours. Anaerobic culturing was performed  
675 in an anaerobic chamber (Bactron).

## 676 **Quantitative PCR assays**

677 qPCR reactions were set up in technical duplicate 10  $\mu$ L reactions in 384-well plates. Standard  
678 curves were constructed using plasmids with the target sequences cloned into them and diluted  
679 tenfold. Plasmids were ordered through IDT via synthesis of the target sequence and cloning it  
680 into the IDTsmart backbone. Reactions were set up according to standard protocols for the  
681 Applied Biosystems Power SYBR Green PCR Master Mix. *C. communis* targeting primers were  
682 previously published<sup>112</sup>, crAss056\_F (CAGAAGTACAACTCCTAAAAACGTAGAG) and  
683 crAss056\_R (GATGACCAATAACAAGCCATTAGC). *P. vulgatus* targeting primer sequences  
684 were Pv\_gmk\_F (GGAAAAGAACGGCATGGTGT) and Pv\_gmk\_R  
685 (ATCCGCCTACCACATCTACG), and were designed to target the guanylate kinase (*gmk*) gene.

## 686 **Culturing phage filtrate on predicted bacterial hosts**

687 After 44 hours of stool-based culture the viral fraction was harvested by pelleting the bacteria  
688 and filtering the supernatant through a 0.2  $\mu$ m filter. The bacterial hosts were grown in  
689 anaerobic overnight cultures of Brain Heart Infusion Supplemented with Hemin and Cysteine  
690 (BHIS) at 37°C. The overnight cultures were then diluted 1:50 into fresh anaerobic BHIS and  
691 grown for roughly four hours until they reached an OD600 reading of ~0.1-0.3. Phage filtrate  
692 was added to bacterial culture with an MOI of ~0.1 based on qPCR quantification of viral copies.  
693 Samples were split into three replicates. As controls, bacterial cultures were grown without  
694 adding phage and phage filtrate was added to fresh BHIS media. Cultures were anaerobically  
695 incubated at 37°C for 44 hours. The *P. vulgatus* strain was obtained from ATCC (*Phocaeicola*  
696 *vulgatus* ATCC 8482™). The *P. dorei* strain was isolated from stool, whole genome sequenced  
697 with paired 150bp reads (Novaseq Illumina).

## 698 **Analysis of publicly available single-cell microbiome sequencing data**

699 Publicly available single-cell microbiome sequencing data were downloaded from SRA  
700 bioproject PRJNA803937<sup>63</sup> and aligned to the *C. communis* reference genome (NC\_067194)  
701 and the *P. vulgatus* genome (*Phocaeicola vulgatus* ATCC 8482™) using Bowtie2 2.5.4<sup>95</sup>. The  
702 same 14 samples identified in the original publication with at least 5% of reads mapping to *C.*  
703 *communis* infecting *P. vulgatus* were identified. Coverage of each genome (*C. communis* and *P.*  
704 *vulgatus*) was calculated using bedtools<sup>108</sup> genomecov by base. The coverage of each base in  
705 the genome was summed and divided by the genome length to calculate the average coverage  
706 of the genome. The ratio of *C. communis* to *P. vulgatus* coverage was taken by dividing the *C.*  
707 *communis* coverage from each sample by the *P. vulgatus* coverage.

## 708 **Figure Legends**

### 709 **Figure 1. The *C. communis* genome encodes both phage and plasmid features**

710 Visual representation of the *C. communis* reference genome with gene annotations and protein  
711 alignments of key genes A) The *C. communis* genome. Gene color denotes strand orientation  
712 (forward = green, reverse = black). Gene annotations are labeled; those in green originate from

713 plasmids, those in purple are implicated in plasmid functions but did not show significant  
714 sequence similarity to any plasmid proteins. Text color of plasmid related genes denotes  
715 previously annotated genes (purple) versus gene annotated in this study (green). B/C) protein  
716 alignment of predicted RepLs in *C. communis* and their closest plasmid relatives. D) protein  
717 alignment of predicted antitoxin in *C. communis* and its closest plasmid relative. E) protein  
718 alignment of predicted toxin in *C. communis* and its closest plasmid relative. F) protein alignment  
719 of predicted MobC in *C. communis* and its closest plasmid relative.

720

## 721 **Figure 2. ProxiMeta Hi-C sequencing for bacterial host prediction of *C. communis***

722 A) Schematic of meta-Hi-C sequencing for host prediction of phages made in BioRender. B) plot  
723 of bacterial MAG abundance vs. chimeric *C. communis*-bacterial MAG reads (“links”) for host  
724 prediction of *C. communis*. Also, see supplementary figure 2. C) Clustered regularly interspaced  
725 short palindromic repeats (CRISPR) spacer analysis via PHISdetector for *C. communis* host  
726 prediction. D) phylogeny of blastp hits to the *Bacteroides*-associated carbohydrate-binding often  
727 N-terminal (BACON) domain containing protein from the *C. communis* genome for bacterial host  
728 prediction.

729

## 730 **Figure 3. *C. communis* genome structure**

731 A) ProxiMeta Hi-C linkage map of *C. communis* internal links, heat color represents number of  
732 ProxiMeta Hi-C links. Also, see supplementary figure 3. B) distribution of *C. communis*-*P.*  
733 *vulgatus* links across the *C. communis* genome (y-axis) and the *P. vulgatus* genome (x-axis),  
734 heat color represents the number of ProxiMeta Hi-C links. C) coverage (y-axis) of shotgun  
735 sequencing across the *C. communis* genome (x-axis). Gray dotted horizontal line represents  
736 average coverage, black dotted horizontal line is 1.8 times the average. Vertical dotted lines  
737 represent the boundaries of the global genome interactions in part B. D) Number of read ends  
738 (5' in gray and 3' in black) over coverage at that base (y-axis) across the *C. communis* genome.

739

## 740 **Figure 4. Two putative origins of replication in *C. communis***

741 A) GC skew plot of the entire *C. communis* genome. B) Genetic context of the two predicted  
742 origins of replication (green), aligned to the GC skew in that region of the genome. C) Coverage  
743 plot of Oxford Nanopore reads across the *C. communis* genome

744

## 745 **Figure 5. Expression of *C. communis* genes in metatranscriptomics**

746 A) Average expression of each gene in the *C. communis* genome across 111  
747 metatranscriptomics samples. Plasmid stranded genes in green, phage stranded gene in black.  
748 B) Ratio of average plasmid gene expression:average phage gene expression in each of the  
749 111 samples. Also, see supplementary figure 4.

750

## 751 **Figure 6. Relatedness of cultured *Crassvirales***

752 Whole genome alignment-based tree showing single representatives of cultured *Crassvirales*  
753 species, the *C. communis* reference genome, and the *C. communis* genome assembly the stool  
754 sample of interest is shown on the left. Synteny plots are shown on the right. The gray color  
755 scale connecting genomes in the synteny plots represents percent nucleotide identity between  
756 the genomes. Genes with identical annotations are colored the same. Hypothetical genes are  
757 yellow.

758

759 **Figure 7. *C. communis* replication in stool-based culture**

760 A) OD600 of a stool sample containing *C. communis* and a negative control stool sample that  
761 does not contain *C. communis*. B) copies of *C. communis* (green) and its predicted host, *P.*  
762 *vulgatus* (black), overtime in stool-based culture of *C. communis* positive stool as measured by  
763 qPCR. Both *P. vulgatus* and *C. communis* were undetectable by qPCR in stool-based culture of  
764 *C. communis* negative stool. Also, see supplementary figures 6-9.

765  
766 **Figure 8. *C. communis* replication in isolate bacterial cultures**

767 A) Copies of *C. communis* per mL of culture measured via qPCR (green solid line), CFU per mL  
768 of culture of *P. vulgatus* with phage filtrate (green dotted line) and without phage filtrate (black  
769 dotted line) \* denotes that CFU per mL with and without phage filtrate added are statistically  
770 significantly different (p-value <0.05). (in the -phage filtrate condition copies of *C. communis* are  
771 undetected) B) Copies of *C. communis* per mL of culture measured via qPCR (green solid line),  
772 CFU per mL of culture of *P. dorei* with phage filtrate (green dotted line) and without phage  
773 filtrate (black dotted line) \* denotes that CFU per mL with and without phage filtrate added are  
774 statistically significantly different (p-value <0.05). (in the -phage filtrate condition copies of *C.*  
775 *communis* are undetected) C) Ratio of *C. communis*:*P. vulgatus* in stool culture (gray), and *P.*  
776 *vulgatus* culture (black). Ratio of *C. communis*:*P. dorei* in *P. dorei* culture (green). D) *C.*  
777 *communis*:*P. vulgatus* ratio of genome length corrected coverage in publicly available single-cell  
778 microbiome sequencing. Also, see supplementary figure 5, 6, and 8.

779  
780 **Supplementary Figure Legends**

781  
782 **Supplementary Fig 1. *repL* genes are found in other *Crassvirales***

783 Protein alignments of all RepL proteins found in *Crassvirales*. A) phylogeny based on protein  
784 alignments. 23 protein sequences are found across 19 *Crassvirales* genomes. Black \*s denote  
785 9 proteins across 8 genomes of *Crassvirales* species that share >70% nucleotide identity across  
786 >88% of their genomes, but share no similarity to *C. communis*. Teal \*s denote 4 proteins  
787 across 4 divergent genomes of *Crassvirales* (divergent both from on another and *C. communis*).  
788 Gray \*s denote 5 proteins across 4 *Crassvirales* genomes that share >96% nucleotide identity  
789 across >96% of the *C. communis* reference genome. Blue \*s denote 2 proteins in one  
790 *Crassvirales* genome belonging to the *Carjivirus* genus. Bright green \*s denote 3 proteins  
791 across 2 *Crassvirales* genomes belonging to *Intestiviridae*. B) protein alignments of RepL  
792 sequences that correspond to the tree shown in part A.

793  
794 **Supplementary Fig 2. ProxiMeta Hi-C sequencing contact maps between *C. communis***  
795 **and bacterial MAGs**

796 A/B) ProxiMeta Hi-C maps of *P. vulgatus* and *C. communis* links at two different heat scales,  
797 heat map color represents number of ProxiMeta Hi-C links. C/D) ProxiMeta Hi-C maps of *P.*  
798 *merdae* and *C. communis*. E/F) ProxiMeta Hi-C maps of *B. stercoris* and *C. communis* G/H)  
799 ProxiMeta Hi-C maps of an unclassified *Prevotella* species and *C. communis*.

800  
801 **Supplementary Fig 3. ProxiMeta Hi-C data suggests that *C. communis* does not integrate**  
802 **into *P. vulgatus***

803 A) Number of ProxiMeta Hi-C links (y-axis) across 10kb bins. Bins 1-10 are *C. communis*. Bins  
804 >10 are *P. vulgatus*. Mann-Whitney U Test: mean for bins 10 and lower (*C. communis*): 563.9,  
805 mean for bins 11 and larger (*P. vulgatus*): 0.859, P-value: 8.766e-09, means are statistically  
806 significantly different. B) zoom in on part A, only showing *P. vulgatus* bins. z-test to determine  
807 outliers based on their deviation from the mean did not determine any outliers.

808

#### 809 **Supplementary Fig 4. Expression of *C. communis* genes in metatranscriptomics**

810 A) Count of samples with RPKM >0 for each gene in *C. communis*, plasmid related genes in  
811 green, phage related genes in black. B) Average RPKM for each gene in *C. communis* across  
812 all samples (n = 111), plasmid related genes in green, phage related genes in black.

813

#### 814 **Supplementary Fig 5. *C. communis* has a wide host range and does not impact OD600**

815 A) OD600 of *P. vulgatus* culture alone (purple) or with phage added (green). OD600 of media  
816 only (black) and media with phage added (gray). B) OD600 of *P. dorei* culture alone (purple) or  
817 with phage added (green). OD600 of media only (black) and media with phage added (gray). C)  
818 OD600 of *B. stercoris* culture alone (purple) or with phage added (green). OD600 of media only  
819 (black) or media with phage added (gray). D) OD600 of *P. merdae* culture alone (purple) or with  
820 phage added (green). OD600 of media only (black) or media with phage added (gray). E)  
821 Copies of *C. communis* per mL of culture were measured via qPCR in *P. merdae* culture  
822 (purple), in *B. stercoris* culture (green), and in media only (gray). *C. communis* was  
823 undetectable in cultures where phage was not added to *P. merdae*, *B. stercoris*, and media.

824

#### 825 **Supplementary Fig 6. *C. communis* qPCR standard curves**

826 Samples were run across multiple qPCR plates, and a separate standard curve was run on  
827 each plate. We plotted the *C. communis* standard curve for each plate A-D) standard curves of  
828 *C. communis* cultured with isolated bacteria time courses. E-G) standard curves of *C. communis*  
829 standards for stool-based culture time course. H) all *C. communis* standards plotted together,  
830 dotted lines represent mean standard curve and +/- 3 Cq (shifted ~1 log in each direction).

831

#### 832 **Supplementary Fig 7. *P. vulgatus* qPCR standard curves**

833 A-B) standard curves of *P. vulgatus* standards for stool-based culture time course. C) all *P.*  
834 *vulgatus* standards plotted together, dotted lines represent mean standard curve and +/- 3 Cq  
835 (shifted ~1 log in each direction).

836

#### 837 **Supplementary Fig 8. *C. communis* qPCR replicates**

838 qPCR technical replicates where the qPCR primers target *C. communis* for A) media with phage  
839 filtrate added (-phage filtrate, copies of *C. communis* are undetected) B) *P. merdae* + phage  
840 filtrate (-phage filtrate, copies of *C. communis* are undetected) C) *B. stercoris* + phage filtrate (-  
841 phage filtrate, copies of *C. communis* are undetected) D) *P. dorei* + phage filtrate (-phage  
842 filtrate, copies of *C. communis* are undetected) E) *P. vulgatus* + phage filtrate (-phage filtrate,  
843 copies of *C. communis* are undetected) F) stool-based culture (-phage filtrate, copies of *C.*  
844 *communis* are undetected)

845

#### 846 **Supplementary Fig 9. *P. vulgatus* qPCR replicates**

847 qPCR technical replicates for stool-based culture, where the qPCR primers target *P. vulgatus*.

848

## 849 References

- 850 1. Pinto, Y., Chakraborty, M., Jain, N., & Bhatt, A. S. (2023). Phage-inclusive profiling of human  
851 gut microbiomes with Phanta. *Nature Biotechnology*. [https://doi.org/10.1038/s41587-](https://doi.org/10.1038/s41587-023-01799-4)  
852 [023-01799-4](https://doi.org/10.1038/s41587-023-01799-4)
- 853 2. Dutilh, B. E., Cassman, N., McNair, K., Sanchez, S. E., Silva, G. G. Z., Boling, L., Barr, J. J.,  
854 Speth, D. R., Seguritan, V., Aziz, R. K., Felts, B., Dinsdale, E. A., Mokili, J. L., &  
855 Edwards, R. A. (2014). A highly abundant bacteriophage discovered in the unknown  
856 sequences of human faecal metagenomes. *Nature Communications*, *5*(1), 4498.  
857 <https://doi.org/10.1038/ncomms5498>
- 858 3. Colavecchio, A., Cadieux, B., Lo, A., & Goodridge, L. D. (2017). Bacteriophages Contribute to  
859 the Spread of Antibiotic Resistance Genes among Foodborne Pathogens of the  
860 Enterobacteriaceae Family – A Review. *Frontiers in Microbiology*, *8*, 1108.  
861 <https://doi.org/10.3389/fmicb.2017.01108>
- 862 4. Jahn, M. T., Arkhipova, K., Markert, S. M., Stigloher, C., Lachnit, T., Pita, L., Kupczok, A.,  
863 Ribes, M., Stengel, S. T., Rosenstiel, P., Dutilh, B. E., & Hentschel, U. (2019). A Phage  
864 Protein Aids Bacterial Symbionts in Eukaryote Immune Evasion. *Cell Host & Microbe*,  
865 *26*(4), 542-550.e5. <https://doi.org/10.1016/j.chom.2019.08.019>
- 866 5. Klimenko, A. I., Matushkin, Y. G., Kolchanov, N. A., & Lashin, S. A. (2016). Bacteriophages  
867 affect evolution of bacterial communities in spatially distributed habitats: A simulation  
868 study. *BMC Microbiology*, *16*(S1), S10. <https://doi.org/10.1186/s12866-015-0620-4>
- 869 6. Schroven, K., Aertsen, A., & Lavigne, R. (2021). Bacteriophages as drivers of bacterial  
870 virulence and their potential for biotechnological exploitation. *FEMS Microbiology*  
871 *Reviews*, *45*(1), fuaa041. <https://doi.org/10.1093/femsre/fuaa041>
- 872 7. Steven W. Wilhelm, & C. Suttle. (1999). *Viruses and Nutrient Cycles in the Sea Viruses play*  
873 *critical roles in the structure and function of aquatic food*. *49*, 781–788.
- 874 8. Łusiak-Szelachowska, M., Weber-Dąbrowska, B., Żaczek, M., Borysowski, J., & Górski, A.  
875 (2020). The Presence of Bacteriophages in the Human Body: Good, Bad or Neutral?  
876 *Microorganisms*, *8*(12), 2012. <https://doi.org/10.3390/microorganisms8122012>
- 877 9. Hou, K., Wu, Z.-X., Chen, X.-Y., Wang, J.-Q., Zhang, D., Xiao, C., Zhu, D., Koya, J. B., Wei,  
878 L., Li, J., & Chen, Z.-S. (2022). Microbiota in health and diseases. *Signal Transduction*  
879 *and Targeted Therapy*, *7*(1), 135. <https://doi.org/10.1038/s41392-022-00974-4>
- 880 10. Manor, O., Dai, C. L., Kornilov, S. A., Smith, B., Price, N. D., Lovejoy, J. C., Gibbons, S. M.,  
881 & Magis, A. T. (2020). Health and disease markers correlate with gut microbiome  
882 composition across thousands of people. *Nature Communications*, *11*(1), 5206.  
883 <https://doi.org/10.1038/s41467-020-18871-1>
- 884 11. Rinninella, E., Raoul, P., Cintoni, M., Franceschi, F., Miggiano, G., Gasbarrini, A., & Mele,  
885 M. (2019). What is the Healthy Gut Microbiota Composition? A Changing Ecosystem  
886 across Age, Environment, Diet, and Diseases. *Microorganisms*, *7*(1), 14.  
887 <https://doi.org/10.3390/microorganisms7010014>
- 888 12. Bodner, K., Melkonian, A. L., & Covert, M. W. (2021). The Enemy of My Enemy: New  
889 Insights Regarding Bacteriophage–Mammalian Cell Interactions. *Trends in Microbiology*,  
890 *29*(6), 528–541. <https://doi.org/10.1016/j.tim.2020.10.014>
- 891 13. Górski, A., Ważna, E., Dąbrowska, B.-W., Dąbrowska, K., Świtła-Jeleń, K., &  
892 Międzybrodzki, R. (2006). Bacteriophage translocation. *FEMS Immunology & Medical*  
893 *Microbiology*, *46*(3), 313–319. <https://doi.org/10.1111/j.1574-695X.2006.00044.x>
- 894 14. Pourtois, J., Tarnita, C. E., & Bonachela, J. A. (2020). Impact of Lytic Phages on

- 895 Phosphorus- vs. Nitrogen-Limited Marine Microbes. *Frontiers in Microbiology*, 11, 221.  
896 <https://doi.org/10.3389/fmicb.2020.00221>
- 897 15. Kieft, K., Zhou, Z., & Anantharaman, K. (2020). VIBRANT: Automated recovery, annotation  
898 and curation of microbial viruses, and evaluation of viral community function from  
899 genomic sequences. *Microbiome*, 8(1), 90. <https://doi.org/10.1186/s40168-020-00867-0>
- 900 16. Minot, S., Bryson, A., Chehoud, C., Wu, G. D., Lewis, J. D., & Bushman, F. D. (2013). Rapid  
901 evolution of the human gut virome. *Proceedings of the National Academy of Sciences*,  
902 110(30), 12450–12455. <https://doi.org/10.1073/pnas.1300833110>
- 903 17. Moreno-Gallego, J. L., Chou, S.-P., Di Rienzi, S. C., Goodrich, J. K., Spector, T. D., Bell, J.  
904 T., Youngblut, N. D., Hewson, I., Reyes, A., & Ley, R. E. (2019). Virome Diversity  
905 Correlates with Intestinal Microbiome Diversity in Adult Monozygotic Twins. *Cell Host &*  
906 *Microbe*, 25(2), 261-272.e5. <https://doi.org/10.1016/j.chom.2019.01.019>
- 907 18. Reyes, A., Haynes, M., Hanson, N., Angly, F. E., Heath, A. C., Rohwer, F., & Gordon, J. I.  
908 (2010). Viruses in the faecal microbiota of monozygotic twins and their mothers. *Nature*,  
909 466(7304), 334–338. <https://doi.org/10.1038/nature09199>
- 910 19. Zuppi, M., Hendrickson, H. L., O’Sullivan, J. M., & Vatanen, T. (2022). Phages in the Gut  
911 Ecosystem. *Frontiers in Cellular and Infection Microbiology*, 11, 822562.  
912 <https://doi.org/10.3389/fcimb.2021.822562>
- 913 20. Manrique, P., Dills, M., & Young, M. (2017). The Human Gut Phage Community and Its  
914 Implications for Health and Disease. *Viruses*, 9(6), 141.  
915 <https://doi.org/10.3390/v9060141>
- 916 21. Shkoporov, A. N., Clooney, A. G., Sutton, T. D. S., Ryan, F. J., Daly, K. M., Nolan, J. A.,  
917 McDonnell, S. A., Khokhlova, E. V., Draper, L. A., Forde, A., Guerin, E., Velayudhan, V.,  
918 Ross, R. P., & Hill, C. (2019). The Human Gut Virome Is Highly Diverse, Stable, and  
919 Individual Specific. *Cell Host & Microbe*, 26(4), 527-541.e5.  
920 <https://doi.org/10.1016/j.chom.2019.09.009>
- 921 22. Pfeifer, E., Moura de Sousa, J. A., Touchon, M., & Rocha, E. P. C. (2021). Bacteria have  
922 numerous distinctive groups of phage–plasmids with conserved phage and variable  
923 plasmid gene repertoires. *Nucleic Acids Research*, 49(5), 2655–2673.  
924 <https://doi.org/10.1093/nar/gkab064>
- 925 23. Piya, D., Nolan, N., Moore, M. L., Ramirez Hernandez, L. A., Cress, B. F., Young, R., Arkin,  
926 A. P., & Mutalik, V. K. (2023). Systematic and scalable genome-wide essentiality  
927 mapping to identify nonessential genes in phages. *PLOS Biology*, 21(12), e3002416.  
928 <https://doi.org/10.1371/journal.pbio.3002416>
- 929 24. Łobocka, M. B., Rose, D. J., Plunkett, G., Rusin, M., Samojedny, A., Lehnerr, H.,  
930 Yarmolinsky, M. B., & Blattner, F. R. (2004). Genome of Bacteriophage P1. *Journal of*  
931 *Bacteriology*, 186(21), 7032–7068. <https://doi.org/10.1128/JB.186.21.7032-7068.2004>
- 932 25. Casey, A., Coffey, A., & McAuliffe, O. (2021). Genetics and Genomics of Bacteriophages:  
933 The Evolution of Bacteriophage Genomes and Genomic Research. In D. R. Harper, S.  
934 T. Abedon, B. H. Burrowes, & M. L. McConville (Eds.), *Bacteriophages* (pp. 193–218).  
935 Springer International Publishing. [https://doi.org/10.1007/978-3-319-41986-2\\_5](https://doi.org/10.1007/978-3-319-41986-2_5)
- 936 26. Bertani, G. (1951). STUDIES ON LYSOGENESIS I: The Mode of Phage Liberation by  
937 Lysogenic *Escherichia coli*. *Journal of Bacteriology*, 62(3), 293–300.  
938 <https://doi.org/10.1128/jb.62.3.293-300.1951>
- 939 27. Shan, X., Szabo, R. E., & Cordero, O. X. (2023). Mutation-induced infections of phage-  
940 plasmids. *Nature Communications*, 14(1), 2049. <https://doi.org/10.1038/s41467-023->



- 941 37512-x
- 942 28. Silpe, J. E., & Bassler, B. L. (2019). A Host-Produced Quorum-Sensing Autoinducer  
943 Controls a Phage Lysis-Lysogeny Decision. *Cell*, 176(1–2), 268-280.e13.  
944 <https://doi.org/10.1016/j.cell.2018.10.059>
- 945 29. Ravin, N. V. (2015). Replication and Maintenance of Linear Phage-Plasmid N15.  
946 *Microbiology Spectrum*, 3(1), 3.1.03. [https://doi.org/10.1128/microbiolspec.PLAS-0032-](https://doi.org/10.1128/microbiolspec.PLAS-0032-2014)  
947 2014
- 948 30. Briani, F., Dehò, G., Forti, F., & Ghisotti, D. (2001). The Plasmid Status of Satellite  
949 Bacteriophage P4. *Plasmid*, 45(1), 1–17. <https://doi.org/10.1006/plas.2000.1497>
- 950 31. Gilcrease, E. B., & Casjens, S. R. (2018). The genome sequence of Escherichia coli tailed  
951 phage D6 and the diversity of Enterobacteriales circular plasmid prophages. *Virology*,  
952 515, 203–214. <https://doi.org/10.1016/j.virol.2017.12.019>
- 953 32. Yutin, N., Makarova, K. S., Gussow, A. B., Krupovic, M., Segall, A., Edwards, R. A., &  
954 Koonin, E. V. (2017). Discovery of an expansive bacteriophage family that includes the  
955 most abundant viruses from the human gut. *Nature Microbiology*, 3(1), 38–46.  
956 <https://doi.org/10.1038/s41564-017-0053-y>
- 957 33. Guerin, E., Shkoporov, A., Stockdale, S. R., Clooney, A. G., Ryan, F. J., Sutton, T. D. S.,  
958 Draper, L. A., Gonzalez-Tortuero, E., Ross, R. P., & Hill, C. (2018). Biology and  
959 Taxonomy of crAss-like Bacteriophages, the Most Abundant Virus in the Human Gut.  
960 *Cell Host & Microbe*, 24(5), 653-664.e6. <https://doi.org/10.1016/j.chom.2018.10.002>
- 961 34. Guerin, E., Shkoporov, A. N., Stockdale, S. R., Comas, J. C., Khokhlova, E. V., Clooney, A.  
962 G., Daly, K. M., Draper, L. A., Stephens, N., Scholz, D., Ross, R. P., & Hill, C. (2021).  
963 Isolation and characterisation of  $\Phi$ crAss002, a crAss-like phage from the human gut that  
964 infects *Bacteroides xylanisolvens*. *Microbiome*, 9(1), 89. [https://doi.org/10.1186/s40168-](https://doi.org/10.1186/s40168-021-01036-7)  
965 021-01036-7
- 966 35. Hryckowian, A. J., Merrill, B. D., Porter, N. T., Van Treuren, W., Nelson, E. J., Garlena, R.  
967 A., Russell, D. A., Martens, E. C., & Sonnenburg, J. L. (2020). *Bacteroides*  
968 *thetaiotaomicron*-Infecting Bacteriophage Isolates Inform Sequence-Based Host Range  
969 Predictions. *Cell Host & Microbe*, 28(3), 371-379.e5.  
970 <https://doi.org/10.1016/j.chom.2020.06.011>
- 971 36. Nayfach, S., Páez-Espino, D., Call, L., Low, S. J., Sberro, H., Ivanova, N. N., Proal, A. D.,  
972 Fischbach, M. A., Bhatt, A. S., Hugenholtz, P., & Kyrpides, N. C. (2021). Metagenomic  
973 compendium of 189,680 DNA viruses from the human gut microbiome. *Nature*  
974 *Microbiology*, 6(7), 960–970. <https://doi.org/10.1038/s41564-021-00928-6>
- 975 37. Shkoporov, A. N., Khokhlova, E. V., Fitzgerald, C. B., Stockdale, S. R., Draper, L. A., Ross,  
976 R. P., & Hill, C. (2018).  $\Phi$ CrAss001 represents the most abundant bacteriophage family  
977 in the human gut and infects *Bacteroides intestinalis*. *Nature Communications*, 9(1),  
978 4781. <https://doi.org/10.1038/s41467-018-07225-7>
- 979 38. Łobocka, M., & Gaęła, U. (2021). Prophage P1: An Example of a Prophage That Is  
980 Maintained as a Plasmid. In D. R. Harper, S. T. Abedon, B. H. Burrowes, & M. L.  
981 McConville (Eds.), *Bacteriophages* (pp. 1–13). Springer International Publishing.  
982 [https://doi.org/10.1007/978-3-319-40598-8\\_54-1](https://doi.org/10.1007/978-3-319-40598-8_54-1)
- 983 39. Pfeifer, E., Bonnin, R. A., & Rocha, E. P. C. (2022). Phage-Plasmids Spread Antibiotic  
984 Resistance Genes through Infection and Lysogenic Conversion. *mBio*, 13(5), e01851-  
985 22. <https://doi.org/10.1128/mbio.01851-22>
- 986 40. Hagbø, M., Ravi, A., Angell, I. L., Sunde, M., Ludvigsen, J., Diep, D. B., Foley, S. L., Vento,

- 987 M., Collado, M. C., Perez-Martinez, G., & Rudi, K. (2020). Experimental support for  
988 multidrug resistance transfer potential in the preterm infant gut microbiota. *Pediatric*  
989 *Research*, 88(1), 57–65. <https://doi.org/10.1038/s41390-019-0491-8>
- 990 41. Sayers, E. W., Bolton, E. E., Brister, J. R., Canese, K., Chan, J., Comeau, D. C., Connor,  
991 R., Funk, K., Kelly, C., Kim, S., Madej, T., Marchler-Bauer, A., Lanczycki, C., Lathrop, S.,  
992 Lu, Z., Thibaud-Nissen, F., Murphy, T., Phan, L., Skripchenko, Y., ... Sherry, S. T.  
993 (2022). Database resources of the national center for biotechnology information. *Nucleic*  
994 *Acids Research*, 50(D1), D20–D26. <https://doi.org/10.1093/nar/gkab1112>
- 995 42. Ni, S., Li, B., Tang, K., Yao, J., Wood, T. K., Wang, P., & Wang, X. (2021). Conjugative  
996 plasmid-encoded toxin–antitoxin system PrpT/PrpA directly controls plasmid copy  
997 number. *Proceedings of the National Academy of Sciences*, 118(4), e2011577118.  
998 <https://doi.org/10.1073/pnas.2011577118>
- 999 43. Zhang, S., & Meyer, R. (1997). The relaxosome protein MobC promotes conjugal plasmid  
1000 mobilization by extending DNA strand separation to the nick site at the origin of transfer.  
1001 *Molecular Microbiology*, 25(3), 509–516. [https://doi.org/10.1046/j.1365-](https://doi.org/10.1046/j.1365-2958.1997.4861849.x)  
1002 [2958.1997.4861849.x](https://doi.org/10.1046/j.1365-2958.1997.4861849.x)
- 1003 44. Godziszewska, J., Kulińska, A., & Jagura-Burdzy, G. (2014). MobC of conjugative RA3  
1004 plasmid from IncU group autoregulates the expression of bicistronic mobC-nic operon  
1005 and stimulates conjugative transfer. *BMC Microbiology*, 14(1), 235.  
1006 <https://doi.org/10.1186/s12866-014-0235-1>
- 1007 45. Smillie, C., Garcillán-Barcia, M. P., Francia, M. V., Rocha, E. P. C., & de la Cruz, F. (2010).  
1008 Mobility of Plasmids. *Microbiology and Molecular Biology Reviews*, 74(3), 434–452.  
1009 <https://doi.org/10.1128/MMBR.00020-10>
- 1010 46. Baños-Sanz, J. I., Mojardín, L., Sanz-Aparicio, J., Lázaro, J. M., Villar, L., Serrano-Heras,  
1011 G., González, B., & Salas, M. (2013). Crystal structure and functional insights into uracil-  
1012 DNA glycosylase inhibition by phage  $\phi$ 29 DNA mimic protein p56. *Nucleic Acids*  
1013 *Research*, 41(13), 6761–6773. <https://doi.org/10.1093/nar/gkt395>
- 1014 47. Krüger, D. H., Schroeder, C., Hansen, S., & Rosenthal, H. A. (1977). Active protection by  
1015 bacteriophages T3 and T7 against *E. coli* B- and K-specific restriction of their DNA.  
1016 *Molecular and General Genetics MGG*, 153(1), 99–106.  
1017 <https://doi.org/10.1007/BF01036001>
- 1018 48. Rauch, B. J., Silvis, M. R., Hultquist, J. F., Waters, C. S., McGregor, M. J., Krogan, N. J., &  
1019 Bondy-Denomy, J. (2017). Inhibition of CRISPR-Cas9 with Bacteriophage Proteins. *Cell*,  
1020 168(1–2), 150–158.e10. <https://doi.org/10.1016/j.cell.2016.12.009>
- 1021 49. Serrano-Heras, G., Bravo, A., & Salas, M. (2008). Phage  $\phi$ 29 protein p56 prevents viral  
1022 DNA replication impairment caused by uracil excision activity of uracil-DNA glycosylase.  
1023 *Proceedings of the National Academy of Sciences*, 105(49), 19044–19049.  
1024 <https://doi.org/10.1073/pnas.0808797105>
- 1025 50. Wang, Z., & Mosbaugh, D. W. (1989). Uracil-DNA glycosylase inhibitor gene of  
1026 bacteriophage PBS2 encodes a binding protein specific for uracil-DNA glycosylase. *The*  
1027 *Journal of Biological Chemistry*, 264(2), 1163–1171.
- 1028 51. Yirmiya, E., Leavitt, A., Lu, A., Ragucci, A. E., Avraham, C., Osterman, I., Garb, J., Antine,  
1029 S. P., Mooney, S. E., Hobbs, S. J., Kranzusch, P. J., Amitai, G., & Sorek, R. (2024).  
1030 Phages overcome bacterial immunity via diverse anti-defence proteins. *Nature*,  
1031 625(7994), 352–359. <https://doi.org/10.1038/s41586-023-06869-w>
- 1032 52. Iida, S., Hiestand-Nauer, R., Sandmeier, H., Lehnerr, H., & Arber, W. (1998). Accessory

- 1033 Genes in the *edarA* Operon of Bacteriophage P1 Affect Antirestriction Function,  
1034 Generalized Transduction, Head Morphogenesis, and Host Cell Lysis. *Virology*, 251(1),  
1035 49–58. <https://doi.org/10.1006/viro.1998.9405>
- 1036 53. Coclet, C., & Roux, S. (2021). Global overview and major challenges of host prediction  
1037 methods for uncultivated phages. *Current Opinion in Virology*, 49, 117–126.  
1038 <https://doi.org/10.1016/j.coviro.2021.05.003>
- 1039 54. Versoza, C. J., & Pfeifer, S. P. (2022). Computational Prediction of Bacteriophage Host  
1040 Ranges. *Microorganisms*, 10(1), 149. <https://doi.org/10.3390/microorganisms10010149>
- 1041 55. Bickhart, D. M., Watson, M., Koren, S., Panke-Buisse, K., Cersosimo, L. M., Press, M. O.,  
1042 Van Tassel, C. P., Van Kessel, J. A. S., Haley, B. J., Kim, S. W., Heiner, C., Suen, G.,  
1043 Bakshy, K., Liachko, I., Sullivan, S. T., Myer, P. R., Ghurye, J., Pop, M., Weimer, P. J.,  
1044 ... Smith, T. P. L. (2019). Assignment of virus and antimicrobial resistance genes to  
1045 microbial hosts in a complex microbial community by combined long-read assembly and  
1046 proximity ligation. *Genome Biology*, 20(1), 153. <https://doi.org/10.1186/s13059-019-1760-x>
- 1048 56. Chen, Y., Wang, Y., Paez-Espino, D., Polz, M. F., & Zhang, T. (2021). Prokaryotic viruses  
1049 impact functional microorganisms in nutrient removal and carbon cycle in wastewater  
1050 treatment plants. *Nature Communications*, 12(1), 5398. <https://doi.org/10.1038/s41467-021-25678-1>
- 1052 57. Hwang, Y., Roux, S., Coclet, C., Krause, S. J. E., & Girguis, P. R. (2023). Viruses interact  
1053 with hosts that span distantly related microbial domains in dense hydrothermal mats.  
1054 *Nature Microbiology*, 8(5), 946–957. <https://doi.org/10.1038/s41564-023-01347-5>
- 1055 58. Ivanova, V., Chernevskaya, E., Vasiluev, P., Ivanov, A., Tolstoganov, I., Shafranskaya, D.,  
1056 Ulyantsev, V., Korobeynikov, A., Razin, S. V., Beloborodova, N., Ulianov, S. V., &  
1057 Tyakht, A. (2022). Hi-C Metagenomics in the ICU: Exploring Clinically Relevant Features  
1058 of Gut Microbiome in Chronically Critically Ill Patients. *Frontiers in Microbiology*, 12,  
1059 770323. <https://doi.org/10.3389/fmicb.2021.770323>
- 1060 59. Marbouty, M., Thierry, A., Millot, G. A., & Koszul, R. (2021). MetaHiC phage-bacteria  
1061 infection network reveals active cycling phages of the healthy human gut. *eLife*, 10,  
1062 e60608. <https://doi.org/10.7554/eLife.60608>
- 1063 60. Tao, Y., Gao, P., Li, B., Xing, P., & Wu, Q. L. (2020). *Tracking Double-Stranded DNA*  
1064 *Bacteriophages and Their Hosts in a Deep Freshwater Lake by Integrating*  
1065 *Metagenomics and The Hi-C Technique* [Preprint]. In Review.  
1066 <https://doi.org/10.21203/rs.3.rs-129104/v1>
- 1067 61. Wu, R., Davison, M. R., Nelson, W. C., Smith, M. L., Lipton, M. S., Jansson, J. K., McClure,  
1068 R. S., McDermott, J. E., & Hofmockel, K. S. (2023). Hi-C metagenome sequencing  
1069 reveals soil phage–host interactions. *Nature Communications*, 14(1), 7666.  
1070 <https://doi.org/10.1038/s41467-023-42967-z>
- 1071 62. Siranosian, B. A., Brooks, E. F., Andermann, T., Rezvani, A. R., Banaei, N., Tang, H., &  
1072 Bhatt, A. S. (2022). Rare transmission of commensal and pathogenic bacteria in the gut  
1073 microbiome of hospitalized adults. *Nature Communications*, 13(1), 586.  
1074 <https://doi.org/10.1038/s41467-022-28048-7>
- 1075 63. Zheng, W., Zhao, S., Yin, Y., Zhang, H., Needham, D. M., Evans, E. D., Dai, C. L., Lu, P. J.,  
1076 Alm, E. J., & Weitz, D. A. (2022). High-throughput, single-microbe genomics with strain  
1077 resolution, applied to a human gut microbiome. *Science*, 376(6597), eabm1483.  
1078 <https://doi.org/10.1126/science.abm1483>

- 1079 64. Zhou, F., Gan, R., Zhang, F., Ren, C., Yu, L., Si, Y., & Huang, Z. (2022). PHISDetector: A  
1080 Tool to Detect Diverse In Silico Phage–host Interaction Signals for Virome Studies.  
1081 *Genomics, Proteomics & Bioinformatics*, 20(3), 508–523.  
1082 <https://doi.org/10.1016/j.gpb.2022.02.003>
- 1083 65. de Jonge, P. A., von Meijenfeldt, F. A. B., van Rooijen, L. E., Brouns, S. J. J., & Dutilh, B. E.  
1084 (2019). Evolution of BACON Domain Tandem Repeats in crAssphage and Novel Gut  
1085 Bacteriophage Lineages. *Viruses*, 11(12), 1085. <https://doi.org/10.3390/v11121085>
- 1086 66. Le, T. B. K., Imakaev, M. V., Mirny, L. A., & Laub, M. T. (2013). High-Resolution Mapping of  
1087 the Spatial Organization of a Bacterial Chromosome. *Science*, 342(6159), 731–734.  
1088 <https://doi.org/10.1126/science.1242059>
- 1089 67. Alexiou, T. S., & Likos, C. N. (2023). Effective Interactions between Double-Stranded DNA  
1090 Molecules in Aqueous Electrolyte Solutions: Effects of Molecular Architecture and  
1091 Counterion Valency. *The Journal of Physical Chemistry B*, 127(31), 6969–6981.  
1092 <https://doi.org/10.1021/acs.jpcc.3c02216>
- 1093 68. Chung, C.-H., Walter, M. H., Yang, L., Chen, S.-C., Winston, V., & Thomas, M. A. (2017).  
1094 Predicting genome terminus sequences of Bacillus cereus-group bacteriophage using  
1095 next generation sequencing data. *BMC Genomics*, 18(1), 350.  
1096 <https://doi.org/10.1186/s12864-017-3744-0>
- 1097 69. Suzuki, Y., Nishijima, S., Furuta, Y., Yoshimura, J., Suda, W., Oshima, K., Hattori, M., &  
1098 Morishita, S. (2019). Long-read metagenomic exploration of extrachromosomal mobile  
1099 genetic elements in the human gut. *Microbiome*, 7(1), 119.  
1100 <https://doi.org/10.1186/s40168-019-0737-z>
- 1101 70. Cohen, G., Or, E., Minas, W., & Sternberg, N. L. (1996). The bacteriophage P 1 lytic  
1102 replicon: Directionality of replication and cis-acting elements. *Gene*, 175(1–2), 151–155.  
1103 [https://doi.org/10.1016/0378-1119\(96\)00141-2](https://doi.org/10.1016/0378-1119(96)00141-2)
- 1104 71. Dong, M.-J., Luo, H., & Gao, F. (2022). Ori-Finder 2022: A Comprehensive Web Server for  
1105 Prediction and Analysis of Bacterial Replication Origins. *Genomics, Proteomics &*  
1106 *Bioinformatics*, 20(6), 1207–1213. <https://doi.org/10.1016/j.gpb.2022.10.002>
- 1107 72. Siranosian, B. A., Tamburini, F. B., Sherlock, G., & Bhatt, A. S. (2020). Acquisition,  
1108 transmission and strain diversity of human gut-colonizing crAss-like phages. *Nature*  
1109 *Communications*, 11(1), 280. <https://doi.org/10.1038/s41467-019-14103-3>
- 1110 73. Zhang, Y., Thompson, K. N., Branck, T., Yan Yan, Nguyen, L. H., Franzosa, E. A., &  
1111 Huttenhower, C. (2021). Metatranscriptomics for the Human Microbiome and Microbial  
1112 Community Functional Profiling. *Annual Review of Biomedical Data Science*, 4(1), 279–  
1113 311. <https://doi.org/10.1146/annurev-biodatasci-031121-103035>
- 1114 74. Adriaenssens, E., & Brister, J. R. (2017). How to Name and Classify Your Phage: An  
1115 Informal Guide. *Viruses*, 9(4), 70. <https://doi.org/10.3390/v9040070>
- 1116 75. Turner, D., Kropinski, A. M., & Adriaenssens, E. M. (2021). A Roadmap for Genome-Based  
1117 Phage Taxonomy. *Viruses*, 13(3), 506. <https://doi.org/10.3390/v13030506>
- 1118 76. Shkoporov, A. N., Khokhlova, E. V., Stephens, N., Hueston, C., Seymour, S., Hryckowian,  
1119 A. J., Scholz, D., Ross, R. P., & Hill, C. (2021). Long-term persistence of crAss-like  
1120 phage crAss001 is associated with phase variation in Bacteroides intestinalis. *BMC*  
1121 *Biology*, 19(1), 163. <https://doi.org/10.1186/s12915-021-01084-3>
- 1122 77. *Rolling Circle Amplification (RCA) and Whole Genome Amplification (WGA)*. (2023). Thermo  
1123 Fisher Scientific. [https://www.thermofisher.com/us/en/home/life-science/pcr/isothermal-](https://www.thermofisher.com/us/en/home/life-science/pcr/isothermal-nucleic-acid-amplification/multiple-displacement-rolling-circle-amplification.html)  
1124 [nucleic-acid-amplification/multiple-displacement-rolling-circle-amplification.html](https://www.thermofisher.com/us/en/home/life-science/pcr/isothermal-nucleic-acid-amplification/multiple-displacement-rolling-circle-amplification.html)

- 1125 78. Yutin, N., Benler, S., Shmakov, S. A., Wolf, Y. I., Tolstoy, I., Rayko, M., Antipov, D.,  
1126 Pevzner, P. A., & Koonin, E. V. (2021). Analysis of metagenome-assembled viral  
1127 genomes from the human gut reveals diverse putative CrAss-like phages with unique  
1128 genomic features. *Nature Communications*, *12*(1), 1044. [https://doi.org/10.1038/s41467-](https://doi.org/10.1038/s41467-021-21350-w)  
1129 [021-21350-w](https://doi.org/10.1038/s41467-021-21350-w)
- 1130 79. Hedžet, S., Rupnik, M., & Accetto, T. (2022). Broad host range may be a key to long-term  
1131 persistence of bacteriophages infecting intestinal Bacteroidaceae species. *Scientific*  
1132 *Reports*, *12*(1), 21098. <https://doi.org/10.1038/s41598-022-25636-x>
- 1133 80. Holmfeldt, K., Solonenko, N., Shah, M., Corrier, K., Riemann, L., VerBerkmoes, N. C., &  
1134 Sullivan, M. B. (2013). Twelve previously unknown phage genera are ubiquitous in  
1135 global oceans. *Proceedings of the National Academy of Sciences*, *110*(31), 12798–  
1136 12803. <https://doi.org/10.1073/pnas.1305956110>
- 1137 81. Gulyaeva, A., Garmaeva, S., Ruigrok, R. A. A., Wang, D., Riksen, N. P., Netea, M. G.,  
1138 Wijmenga, C., Weersma, R. K., Fu, J., Vila, A. V., Kurilshikov, A., & Zhernakova, A.  
1139 (2022). Discovery, diversity, and functional associations of crAss-like phages in human  
1140 gut metagenomes from four Dutch cohorts. *Cell Reports*, *38*(2), 110204.  
1141 <https://doi.org/10.1016/j.celrep.2021.110204>
- 1142 82. Smith, L., Goldobina, E., Govi, B., & Shkoporov, A. N. (2023). Bacteriophages of the Order  
1143 Crassvirales: What Do We Currently Know about This Keystone Component of the  
1144 Human Gut Virome? *Biomolecules*, *13*(4), 584. <https://doi.org/10.3390/biom13040584>
- 1145 83. Pfeifer, E., & Rocha, E. P. C. (2024). Phage-plasmids promote recombination and  
1146 emergence of phages and plasmids. *Nature Communications*, *15*(1), 1545.  
1147 <https://doi.org/10.1038/s41467-024-45757-3>
- 1148 84. Feiss, M., Fisher, R. A., Crayton, M. A., & Egner, C. (1977). Packaging of the bacteriophage  
1149  $\lambda$  chromosome: Effect of chromosome length. *Virology*, *77*(1), 281–293.  
1150 [https://doi.org/10.1016/0042-6822\(77\)90425-1](https://doi.org/10.1016/0042-6822(77)90425-1)
- 1151 85. Kent, A. G., Vill, A. C., Shi, Q., Satlin, M. J., & Brito, I. L. (2020). Widespread transfer of  
1152 mobile antibiotic resistance genes within individual gut microbiomes revealed through  
1153 bacterial Hi-C. *Nature Communications*, *11*(1), 4379. [https://doi.org/10.1038/s41467-](https://doi.org/10.1038/s41467-020-18164-7)  
1154 [020-18164-7](https://doi.org/10.1038/s41467-020-18164-7)
- 1155 86. Hochhauser, D., Millman, A., & Sorek, R. (2023). The defense island repertoire of the  
1156 *Escherichia coli* pan-genome. *PLOS Genetics*, *19*(4), e1010694.  
1157 <https://doi.org/10.1371/journal.pgen.1010694>
- 1158 87. Cervantes-Echeverría, M., Gallardo-Becerra, L., Cornejo-Granados, F., & Ochoa-Leyva, A.  
1159 (2023). The Two-Faced Role of crAssphage Subfamilies in Obesity and Metabolic  
1160 Syndrome: Between Good and Evil. *Genes*, *14*(1), 139.  
1161 <https://doi.org/10.3390/genes14010139>
- 1162 88. Clooney, A. G., Sutton, T. D. S., Shkoporov, A. N., Holohan, R. K., Daly, K. M., O'Regan,  
1163 O., Ryan, F. J., Draper, L. A., Plevy, S. E., Ross, R. P., & Hill, C. (2019). Whole-Virome  
1164 Analysis Sheds Light on Viral Dark Matter in Inflammatory Bowel Disease. *Cell Host &*  
1165 *Microbe*, *26*(6), 764–778.e5. <https://doi.org/10.1016/j.chom.2019.10.009>
- 1166 89. Edwards, R. A., Vega, A. A., Norman, H. M., Ohaeri, M., Levi, K., Dinsdale, E. A., Cinek, O.,  
1167 Aziz, R. K., McNair, K., Barr, J. J., Bibby, K., Brouns, S. J. J., Cazares, A., De Jonge, P.  
1168 A., Desnues, C., Díaz Muñoz, S. L., Fineran, P. C., Kurilshikov, A., Lavigne, R., ...  
1169 Dutilh, B. E. (2019). Global phylogeography and ancient evolution of the widespread  
1170 human gut virus crAssphage. *Nature Microbiology*, *4*(10), 1727–1736.

- 1171 <https://doi.org/10.1038/s41564-019-0494-6>
- 1172 90. Honap, T. P., Sankaranarayanan, K., Schnorr, S. L., Ozga, A. T., Warinner, C., & Lewis, C.  
1173 M. (2020). Biogeographic study of human gut-associated crAssphage suggests impacts  
1174 from industrialization and recent expansion. *PLOS ONE*, *15*(1), e0226930.  
1175 <https://doi.org/10.1371/journal.pone.0226930>
- 1176 91. Liang, Y. Y., Zhang, W., Tong, Y. G., & Chen, S. P. (2016). crAssphage is not associated  
1177 with diarrhoea and has high genetic diversity. *Epidemiology and Infection*, *144*(16),  
1178 3549–3553. <https://doi.org/10.1017/S095026881600176X>
- 1179 92. Altschul, S. F., Gish, W., Miller, W., Myers, E. W., & Lipman, D. J. (1990). Basic local  
1180 alignment search tool. *Journal of Molecular Biology*, *215*(3), 403–410.  
1181 [https://doi.org/10.1016/S0022-2836\(05\)80360-2](https://doi.org/10.1016/S0022-2836(05)80360-2)
- 1182 93. Johnson, L. S., Eddy, S. R., & Portugaly, E. (2010). Hidden Markov model speed heuristic  
1183 and iterative HMM search procedure. *BMC Bioinformatics*, *11*(1), 431.  
1184 <https://doi.org/10.1186/1471-2105-11-431>
- 1185 94. Wood, D. E., Lu, J., & Langmead, B. (2019). Improved metagenomic analysis with Kraken 2.  
1186 *Genome Biology*, *20*(1), 257. <https://doi.org/10.1186/s13059-019-1891-0>
- 1187 95. Langmead, B., & Salzberg, S. L. (2012). Fast gapped-read alignment with Bowtie 2. *Nature*  
1188 *Methods*, *9*(4), 357–359. <https://doi.org/10.1038/nmeth.1923>
- 1189 96. Langmead, B., Wilks, C., Antonescu, V., & Charles, R. (2019). Scaling read aligners to  
1190 hundreds of threads on general-purpose processors. *Bioinformatics*, *35*(3), 421–432.  
1191 <https://doi.org/10.1093/bioinformatics/bty648>
- 1192 97. Goloborodko, A., Venev, S., Spracklin, G., Nezar Abdennur, Agalitsyna, Shaytan, A.,  
1193 Flyamer, I., Di Tommaso, P., & Sergey-Kolchenko. (2022). *open2c/distiller-nf: V0.3.4*  
1194 (v0.3.4) [Computer software]. [object Object]. <https://doi.org/10.5281/ZENODO.7309110>
- 1195 98. Open2C, Abdennur, N., Abraham, S., Fudenberg, G., Flyamer, I. M., Galitsyna, A. A.,  
1196 Goloborodko, A., Imakaev, M., Oksuz, B. A., & Venev, S. V. (2022). *Cooltools: Enabling*  
1197 *high-resolution Hi-C analysis in Python* [Preprint]. Bioinformatics.  
1198 <https://doi.org/10.1101/2022.10.31.514564>
- 1199 99. Hunter, J. D. (2007). Matplotlib: A 2D Graphics Environment. *Computing in Science &*  
1200 *Engineering*, *9*(3), 90–95. <https://doi.org/10.1109/MCSE.2007.55>
- 1201 100. Yu, G., Smith, D. K., Zhu, H., Guan, Y., & Lam, T. T. (2017). ggtree: An r package for  
1202 visualization and annotation of phylogenetic trees with their covariates and other  
1203 associated data. *Methods in Ecology and Evolution*, *8*(1), 28–36.  
1204 <https://doi.org/10.1111/2041-210X.12628>
- 1205 101. Moss, E. L., Maghini, D. G., & Bhatt, A. S. (2020). Complete, closed bacterial genomes  
1206 from microbiomes using nanopore sequencing. *Nature Biotechnology*, *38*(6), 701–707.  
1207 <https://doi.org/10.1038/s41587-020-0422-6>
- 1208 102. Koren, S., Walenz, B. P., Berlin, K., Miller, J. R., Bergman, N. H., & Phillippy, A. M. (2017).  
1209 Canu: Scalable and accurate long-read assembly via adaptive *k*-mer weighting and  
1210 repeat separation. *Genome Research*, *27*(5), 722–736.  
1211 <https://doi.org/10.1101/gr.215087.116>
- 1212 103. Walker, B. J., Abeel, T., Shea, T., Priest, M., Abouelliel, A., Sakthikumar, S., Cuomo, C. A.,  
1213 Zeng, Q., Wortman, J., Young, S. K., & Earl, A. M. (2014). Pilon: An Integrated Tool for  
1214 Comprehensive Microbial Variant Detection and Genome Assembly Improvement. *PLoS*  
1215 *ONE*, *9*(11), e112963. <https://doi.org/10.1371/journal.pone.0112963>
- 1216 104. Li, H. (2018). Minimap2: Pairwise alignment for nucleotide sequences. *Bioinformatics*,

- 1217 34(18), 3094–3100. <https://doi.org/10.1093/bioinformatics/bty191>
- 1218 105. Li, H., Handsaker, B., Wysoker, A., Fennell, T., Ruan, J., Homer, N., Marth, G., Abecasis,  
1219 G., Durbin, R., & 1000 Genome Project Data Processing Subgroup. (2009). The  
1220 Sequence Alignment/Map format and SAMtools. *Bioinformatics*, 25(16), 2078–2079.  
1221 <https://doi.org/10.1093/bioinformatics/btp352>
- 1222 106. Lu, J., & Salzberg, S. L. (2020). SkewIT: The Skew Index Test for large-scale GC Skew  
1223 analysis of bacterial genomes. *PLOS Computational Biology*, 16(12), e1008439.  
1224 <https://doi.org/10.1371/journal.pcbi.1008439>
- 1225 107. Abu-Ali, G. S., Mehta, R. S., Lloyd-Price, J., Mallick, H., Branck, T., Ivey, K. L., Drew, D. A.,  
1226 DuLong, C., Rimm, E., Izard, J., Chan, A. T., & Huttenhower, C. (2018).  
1227 Metatranscriptome of human faecal microbial communities in a cohort of adult men.  
1228 *Nature Microbiology*, 3(3), 356–366. <https://doi.org/10.1038/s41564-017-0084-4>
- 1229 108. Quinlan, A. R., & Hall, I. M. (2010). BEDTools: A flexible suite of utilities for comparing  
1230 genomic features. *Bioinformatics*, 26(6), 841–842.  
1231 <https://doi.org/10.1093/bioinformatics/btq033>
- 1232 109. Sievers, F., Wilm, A., Dineen, D., Gibson, T. J., Karplus, K., Li, W., Lopez, R., McWilliam,  
1233 H., Remmert, M., Söding, J., Thompson, J. D., & Higgins, D. G. (2011). Fast, scalable  
1234 generation of high-quality protein multiple sequence alignments using Clustal Omega.  
1235 *Molecular Systems Biology*, 7(1), 539. <https://doi.org/10.1038/msb.2011.75>
- 1236 110. Wei, X., Tan, H., Lobb, B., Zhen, W., Wu, Z., Parks, D. H., Neufeld, J. D., Moreno-  
1237 Hagelsieb, G., & Doxey, A. C. (2024). *AnnoView enables large-scale analysis,*  
1238 *comparison, and visualization of microbial gene neighborhoods* [Preprint].  
1239 *Bioinformatics*. <https://doi.org/10.1101/2024.01.15.575735>
- 1240 111. Sullivan, M. J., Petty, N. K., & Beatson, S. A. (2011). Easyfig: A genome comparison  
1241 visualizer. *Bioinformatics*, 27(7), 1009–1010.  
1242 <https://doi.org/10.1093/bioinformatics/btr039>
- 1243 112. Stachler, E., Kelty, C., Sivaganesan, M., Li, X., Bibby, K., & Shanks, O. C. (2017).  
1244 Quantitative CrAssphage PCR Assays for Human Fecal Pollution Measurement.  
1245 *Environmental Science & Technology*, 51(16), 9146–9154.  
1246 <https://doi.org/10.1021/acs.est.7b02703>

| Predicted Host                                                                                                             | Level of Host Prediction | Prediction Method                        | Publication                       |
|----------------------------------------------------------------------------------------------------------------------------|--------------------------|------------------------------------------|-----------------------------------|
| <i>Prevotellaceae</i>                                                                                                      | Family                   | Abundance correlation                    | Edwards et al., 2019              |
| <i>Bacteroidota</i>                                                                                                        | Phylum                   | Co-occurrence                            | Dutilh et al., 2014               |
| <i>Firmicutes, Proteobacteria, Bacteroidota, Cyanobacteria, Marinimicrobia</i>                                             | Phylum                   | Homology                                 | Dutilh et al., 2014               |
| <i>Bacteroidota, Coprobacillus and Fusobacterium</i>                                                                       | Phylum                   | oligonucleotide frequency dissimilarity  | Ahlgren et al., 2016              |
| <i>Bacteroidota</i>                                                                                                        | Phylum                   | BACON homology                           | Jonge et al., 2019                |
| <i>Bacteroidota</i>                                                                                                        | Phylum                   | CRISPR-spacer analysis                   | Sugimoto et al., 2021             |
| <i>Phocaeicola, Bacteroides</i>                                                                                            | Genus                    | CRISPR-spacer analysis                   | Shkoporov et al., 2019            |
| <i>Phocaeicola, Bacteroides</i>                                                                                            | Genus                    | Abundance correlation                    | Cervantes-Echeverría et al., 2023 |
| <i>Phocaeicola vulgatus</i>                                                                                                | Species                  | CRISPR-spacer analysis                   | Suzuki et al., 2019               |
| <i>Phocaeicola vulgatus</i>                                                                                                | Species                  | CRISPR-spacer analysis                   | Yutin et al., 2021                |
| <i>Anaerobutyricum hallii, Phocaeicola vulgatus, Blautia spp, Dorea longicatena, Eubacterium limosum, Ruminococcus spp</i> | Species                  | CRISPR-spacer analysis                   | Tomofuji et al., 2022             |
| <i>Phocaeicola dorei</i>                                                                                                   | Species                  | Abundance correlation                    | Cinek et al., 2016                |
| <i>Phocaeicola dorei and Bacteroides uniformis.</i>                                                                        | Species                  | Co-occurrence in fecal fermentation      | Guerin et al., 2018               |
| <i>Prevotella intermedia 17, Bacteroides sp. 20_3</i>                                                                      | Species                  | CRISPR-spacer analysis                   | Dutilh et al., 2014               |
| <i>Porphyromonas sp. 31_2</i>                                                                                              | Species                  | CRISPR-spacer analysis                   | Yutin et al., 2017                |
| <i>Escherichia coli</i>                                                                                                    | Species                  | Kernelized logistic matrix factorization | Lui et al., 2019                  |
| <i>Faecalibacterium prausnitzii</i>                                                                                        | Species                  | Abundance correlation                    | Tomofuji et al., 2022             |



|                             |        |                                   |                    |
|-----------------------------|--------|-----------------------------------|--------------------|
| <i>Phocaeicola vulgatus</i> | Strain | Single-cell microbiome sequencing | Zheng et al., 2022 |
|-----------------------------|--------|-----------------------------------|--------------------|



# Figure 2

## A

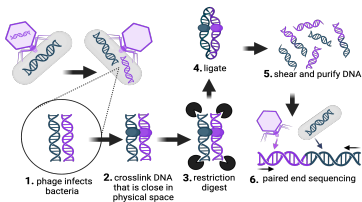

## B

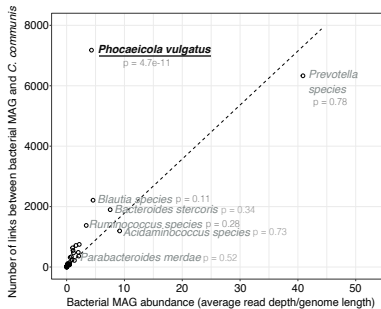

## C

```

P. vulgatus CTTATCCTACATTGATATTATTGAATGGT
C. communis CTTATCCTACATTGATATTATTGAATGGT
                17268      C. communis coordinates 17267

P. distansoris TTCATTAGAATAACCTCTATCTTCATAAC
C. communis   TTCATTAGAATAACCTCTATCTTCATAAC
                84553      C. communis coordinates 84581
    
```

## D

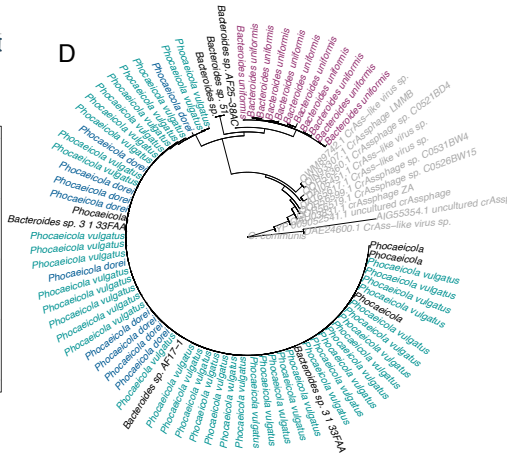

# Figure 3

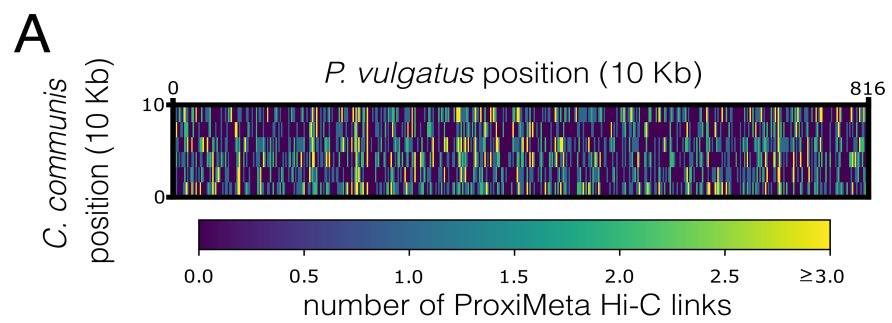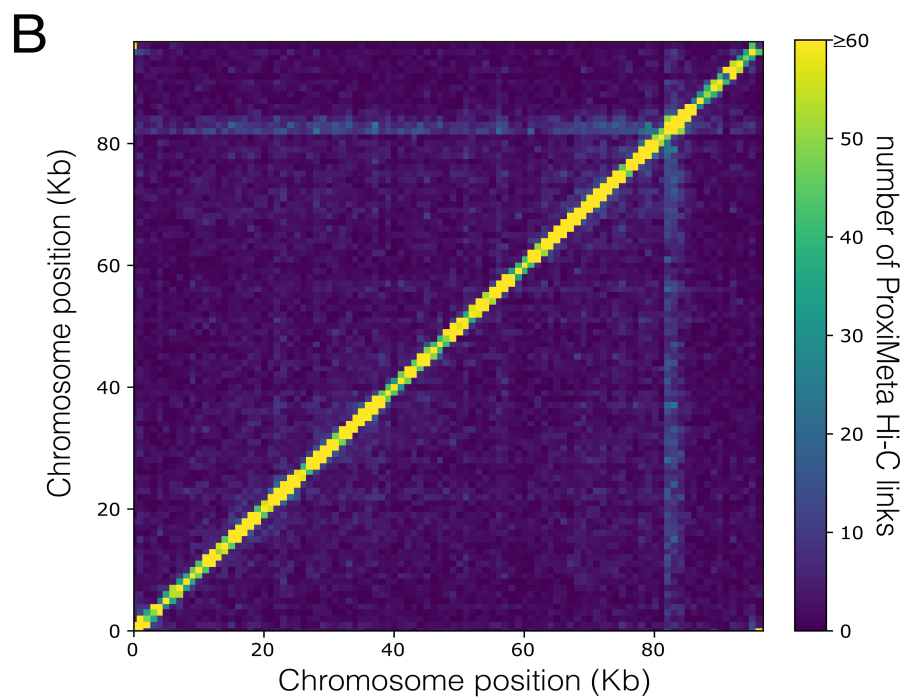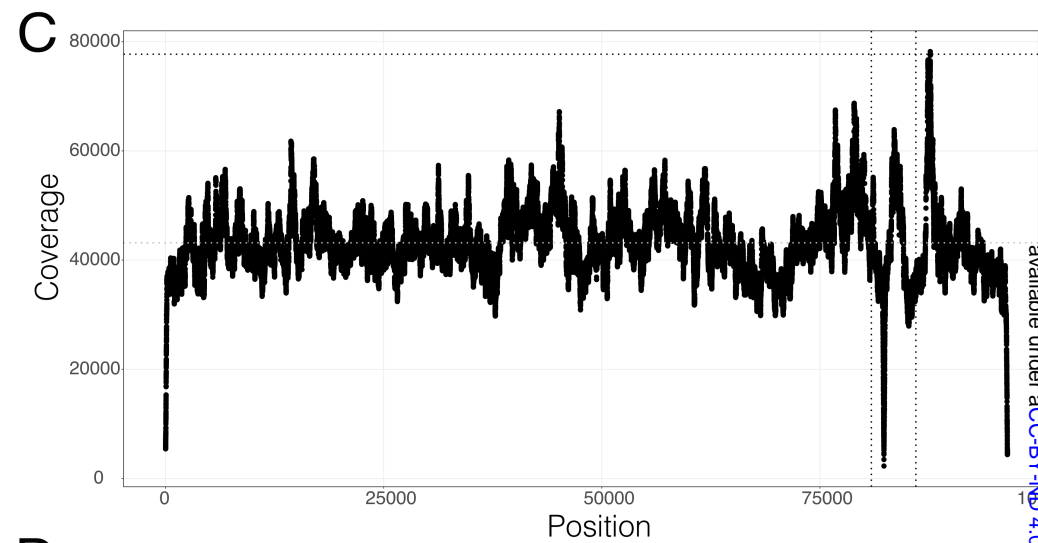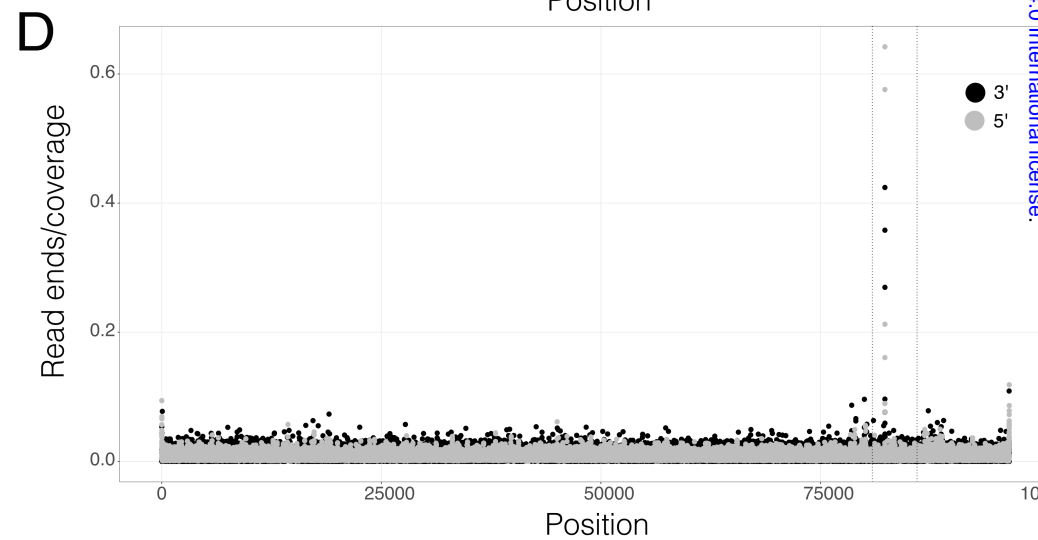

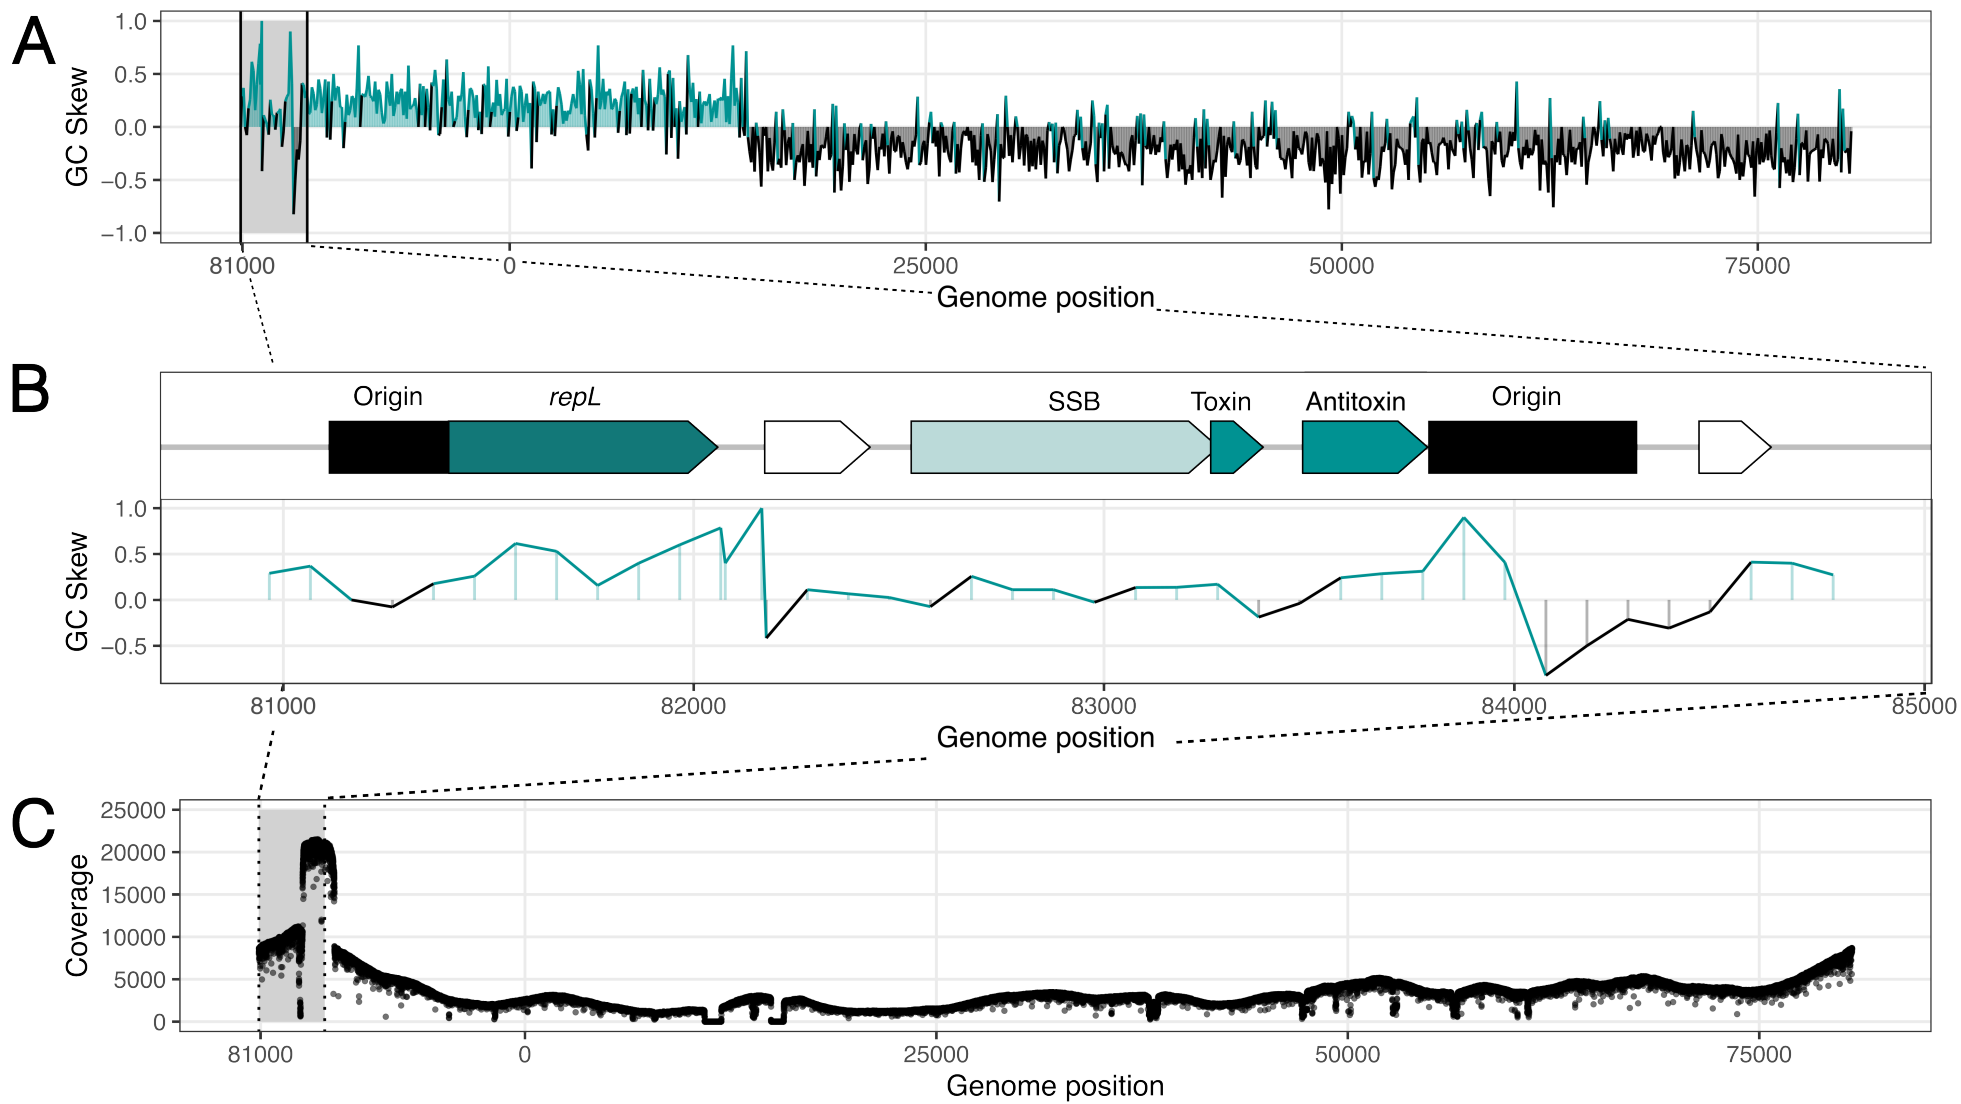

# Figure 5

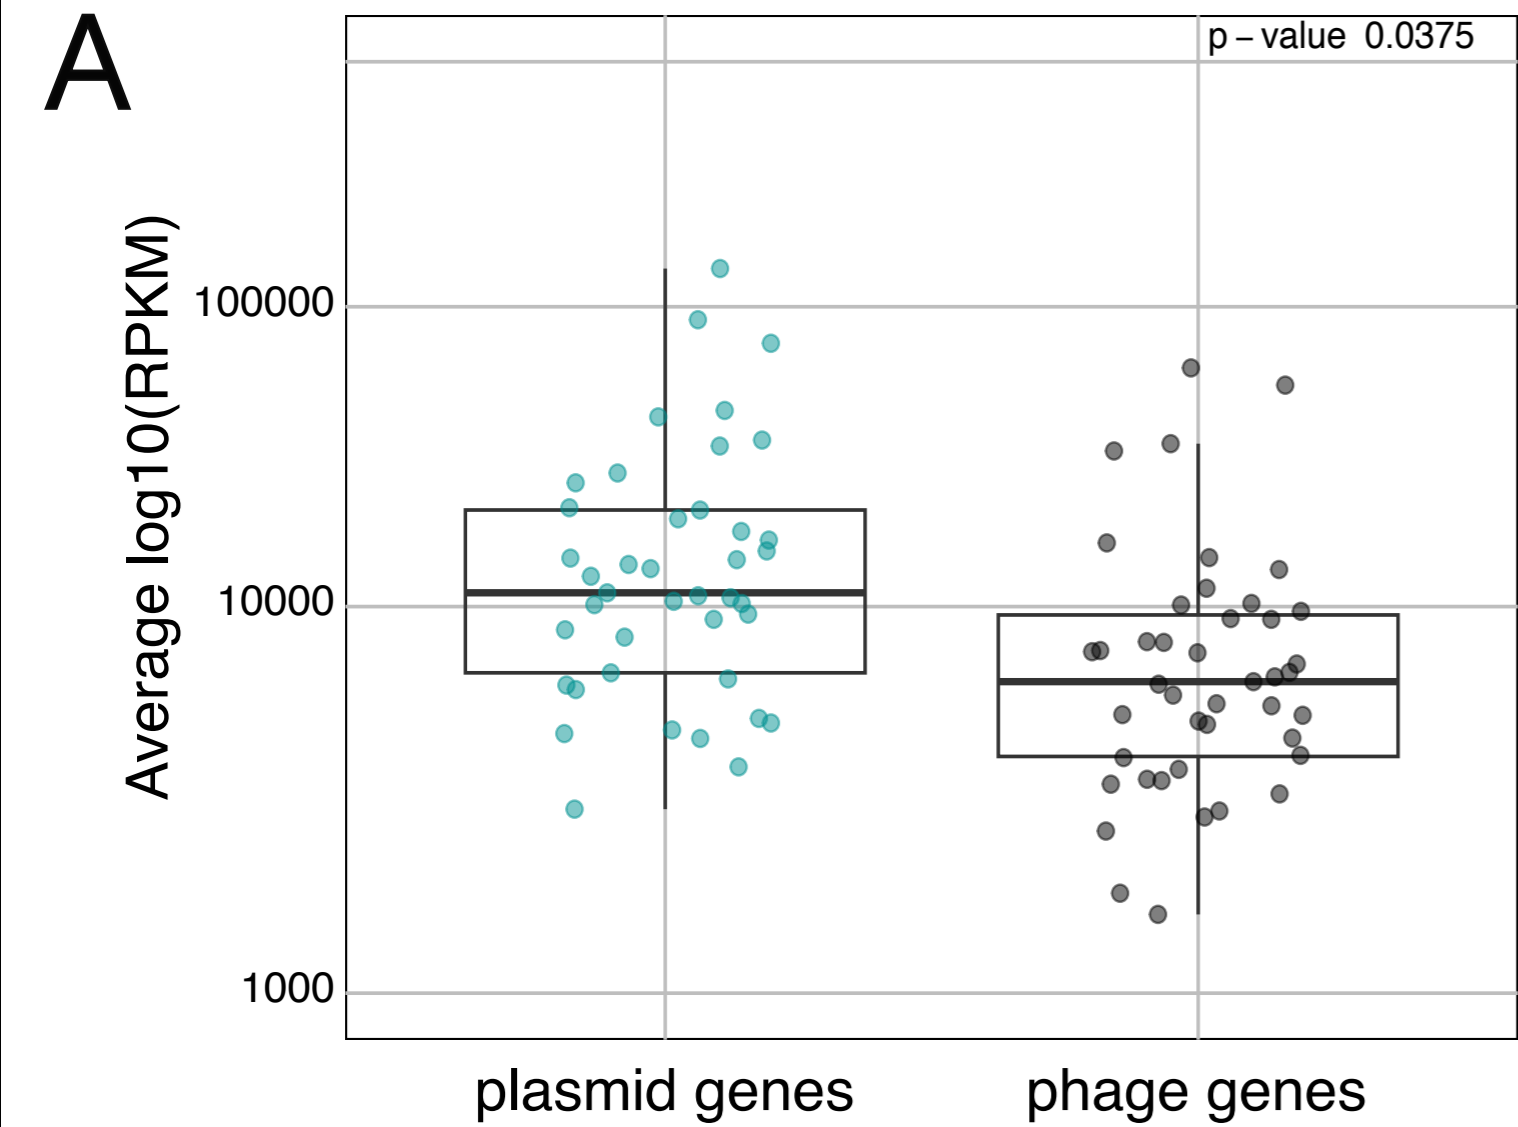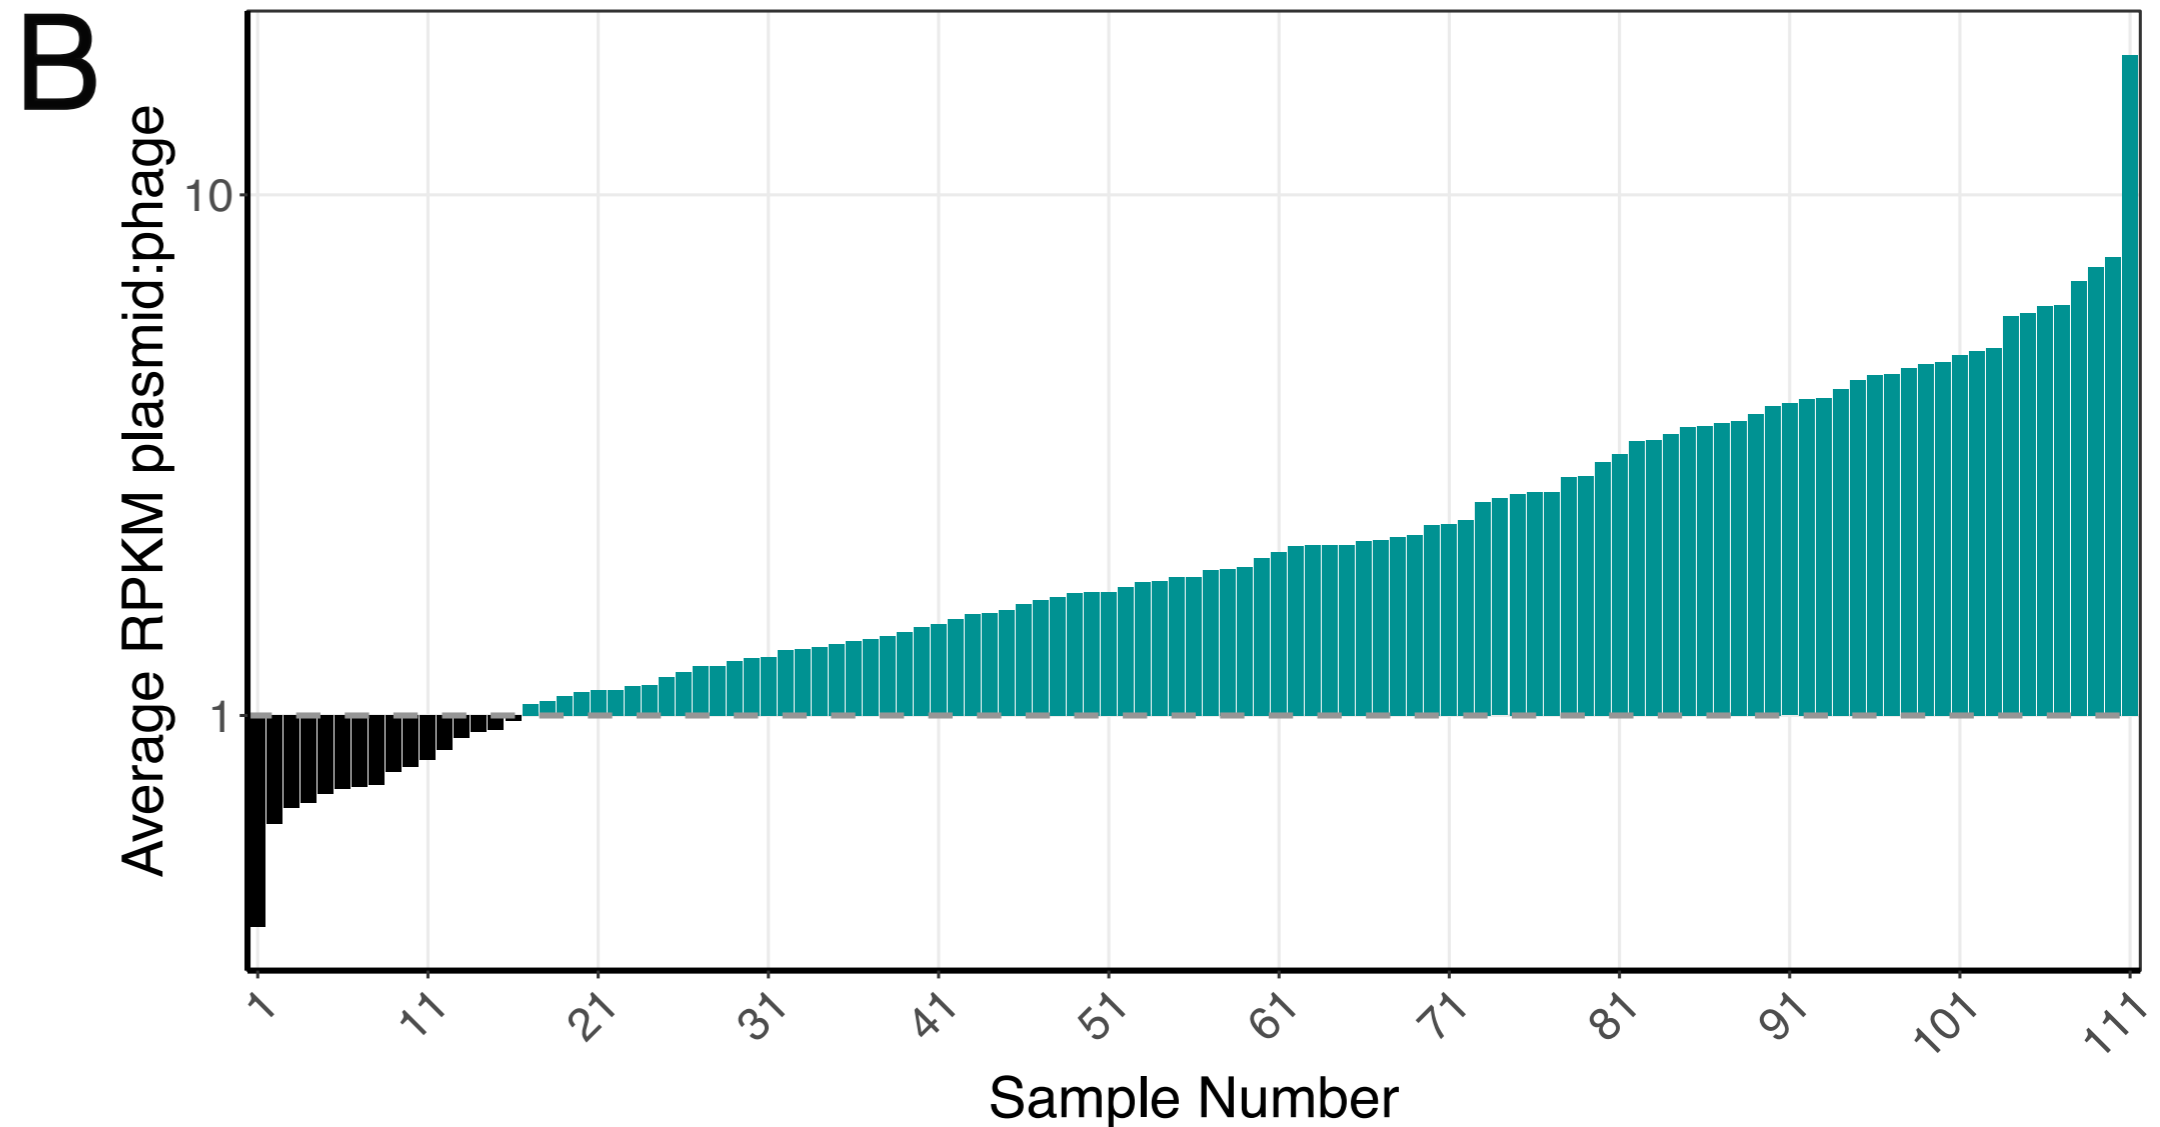

# Figure 6

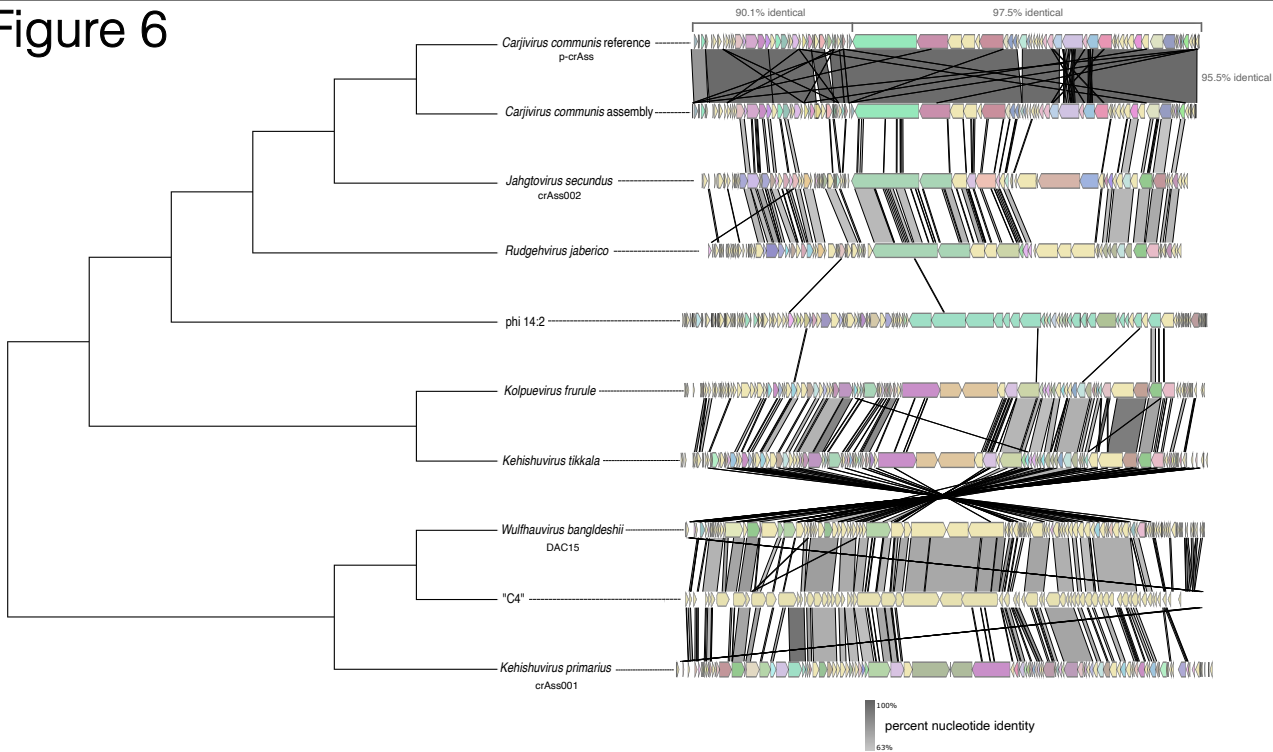

# Figure 7

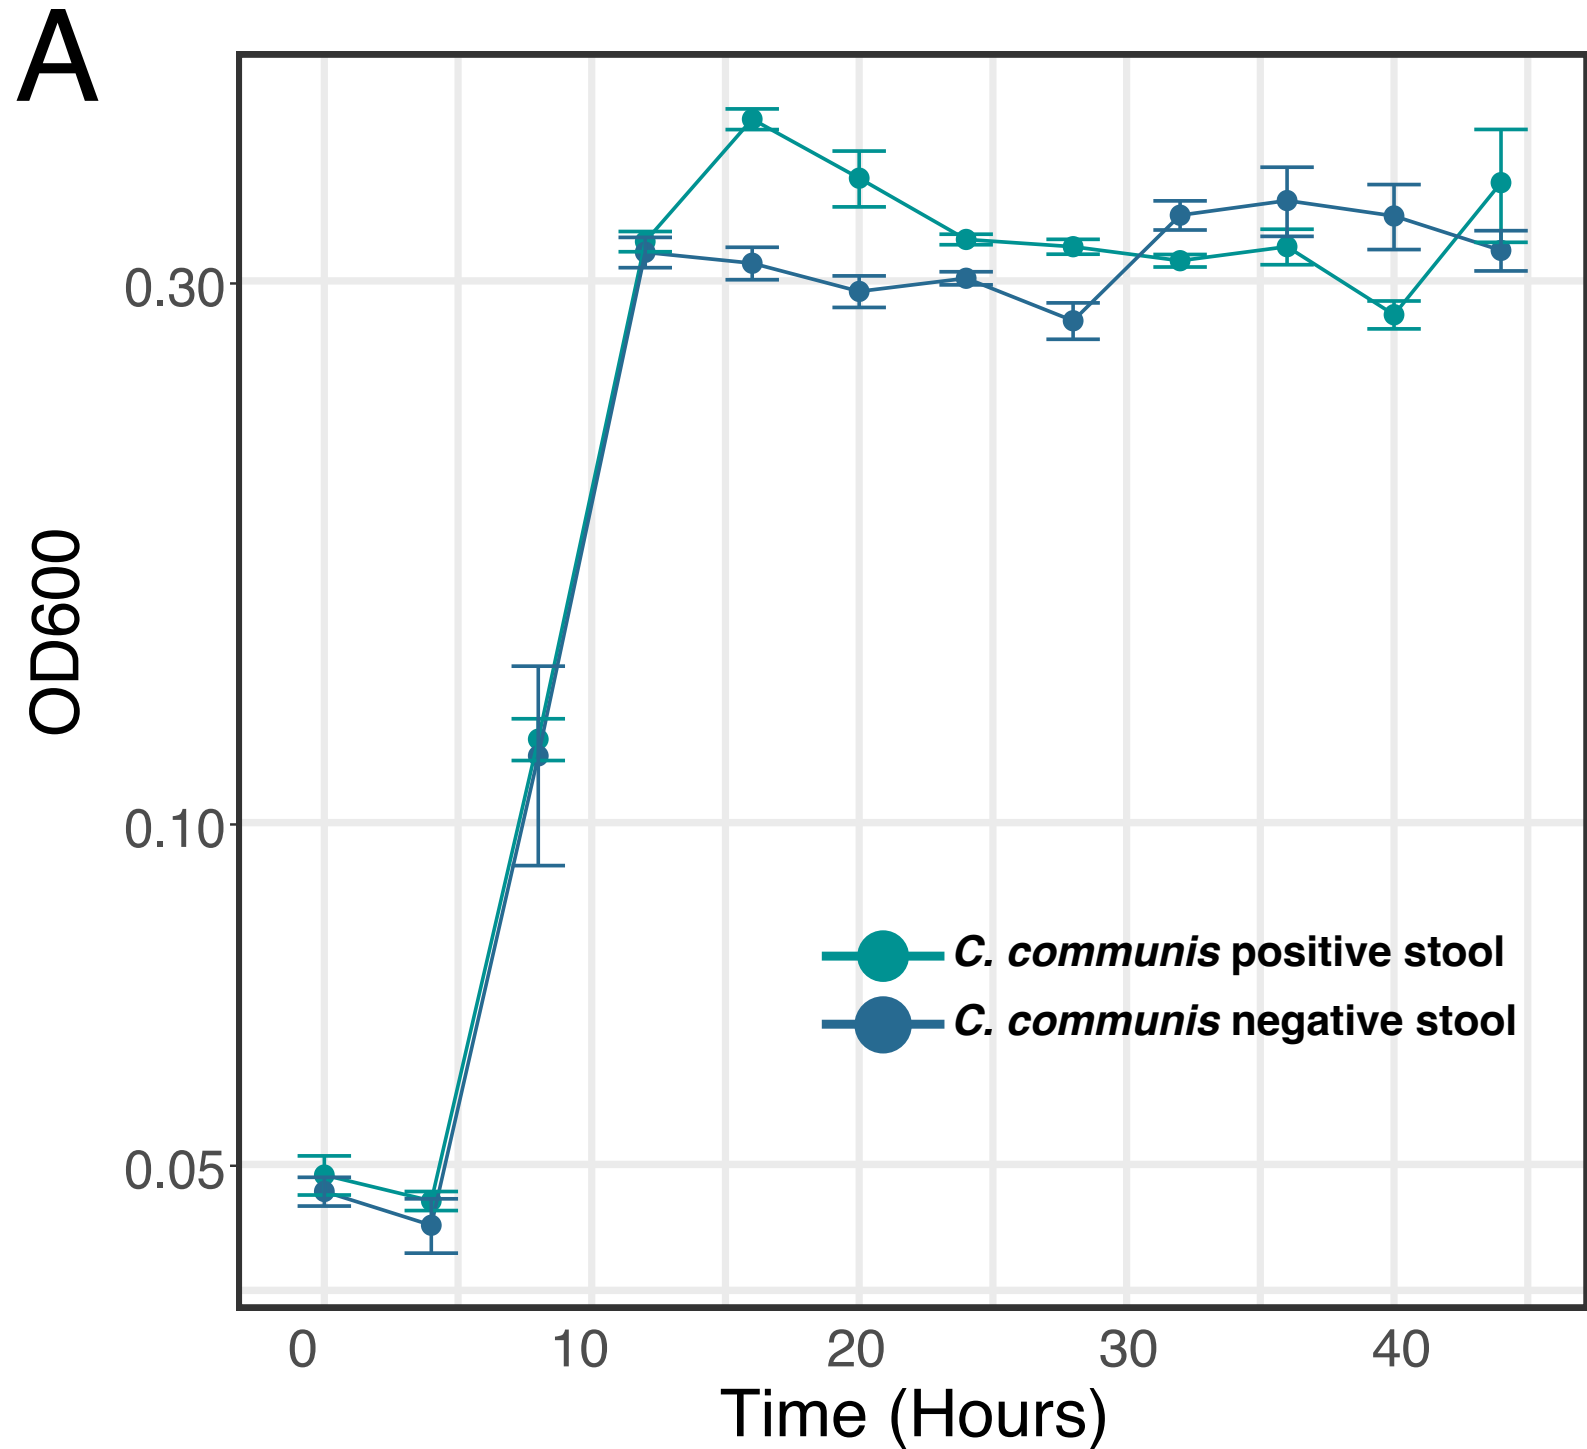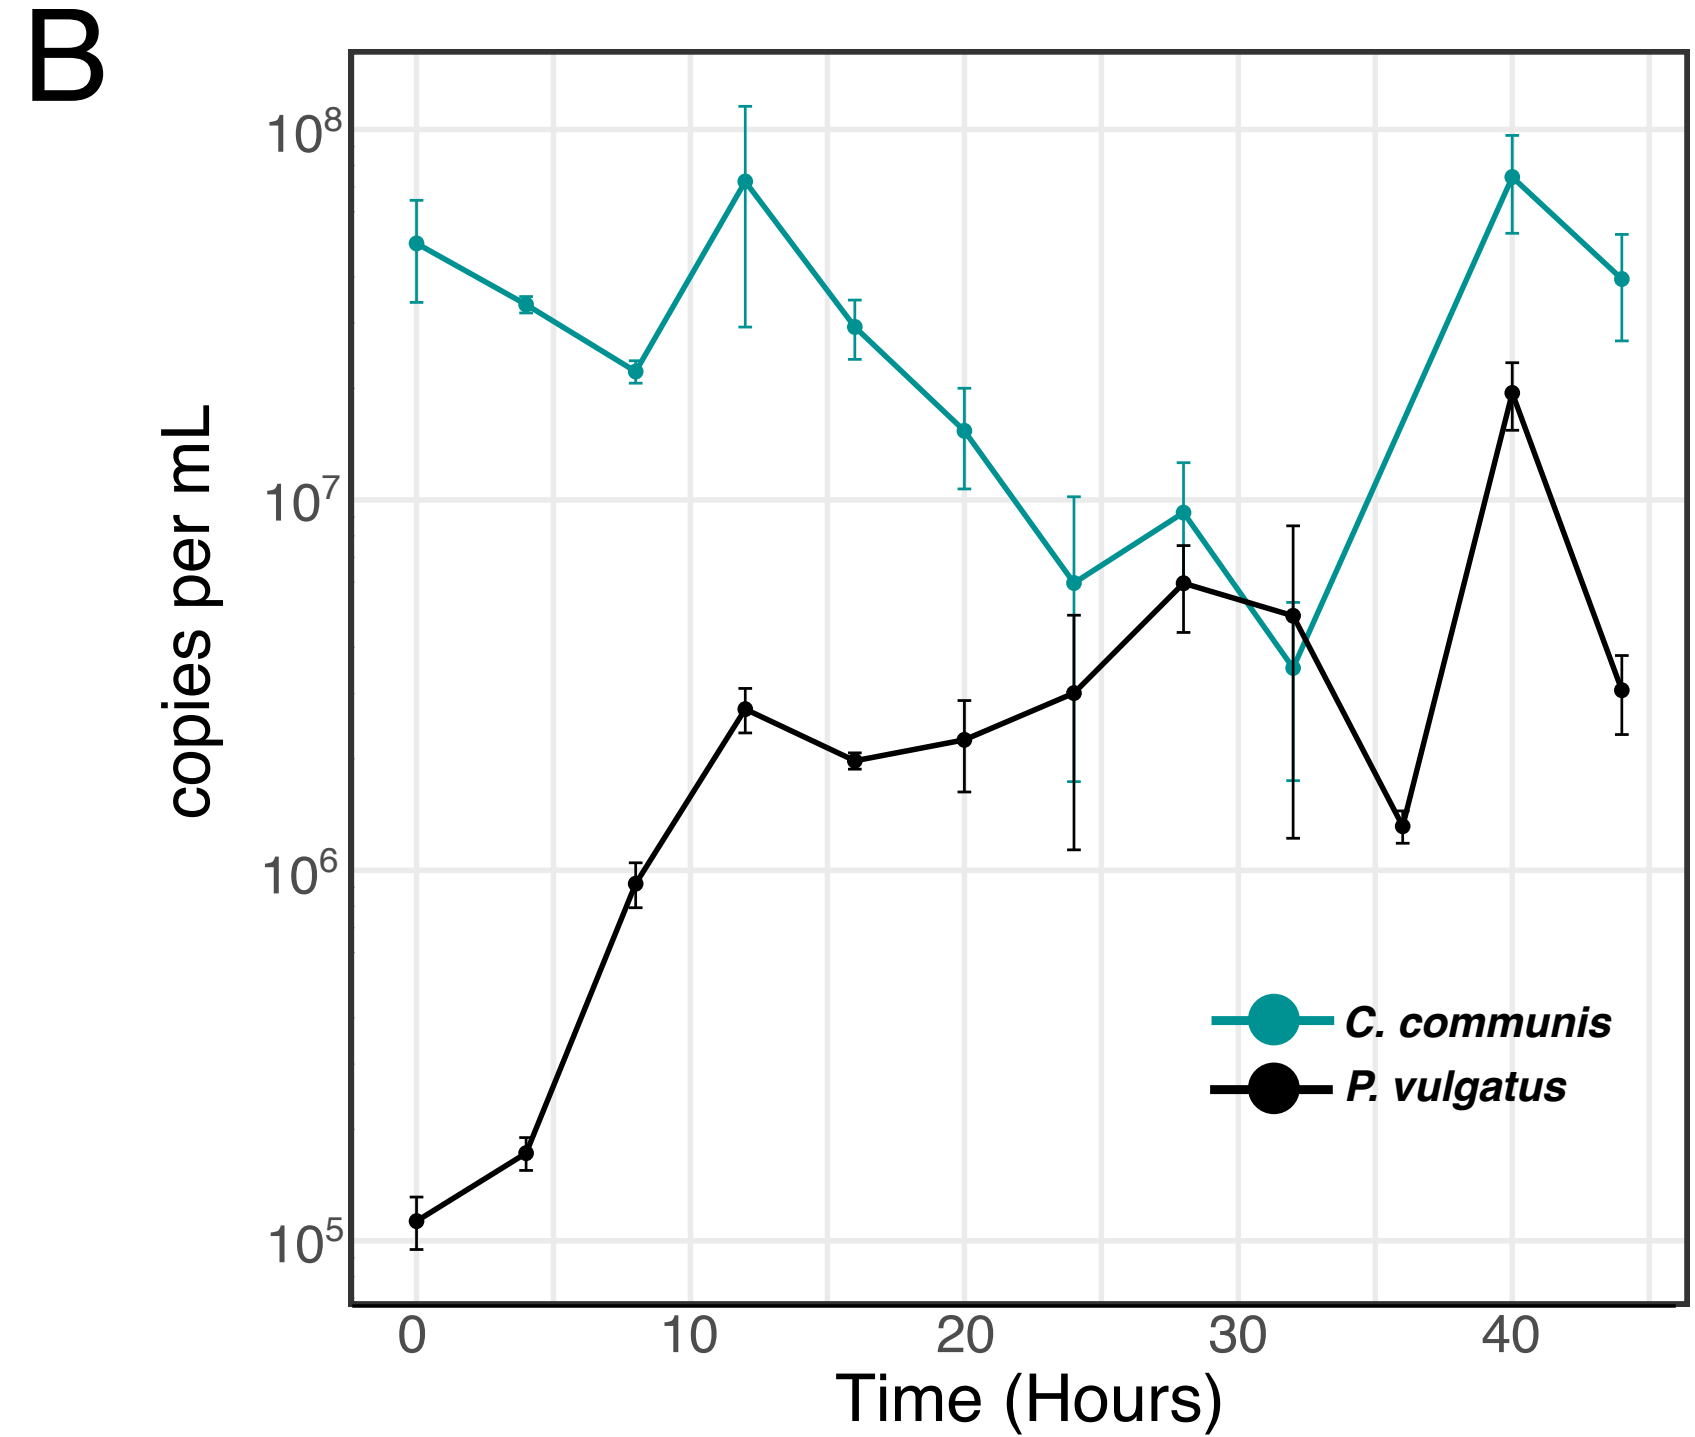



# Figure 8

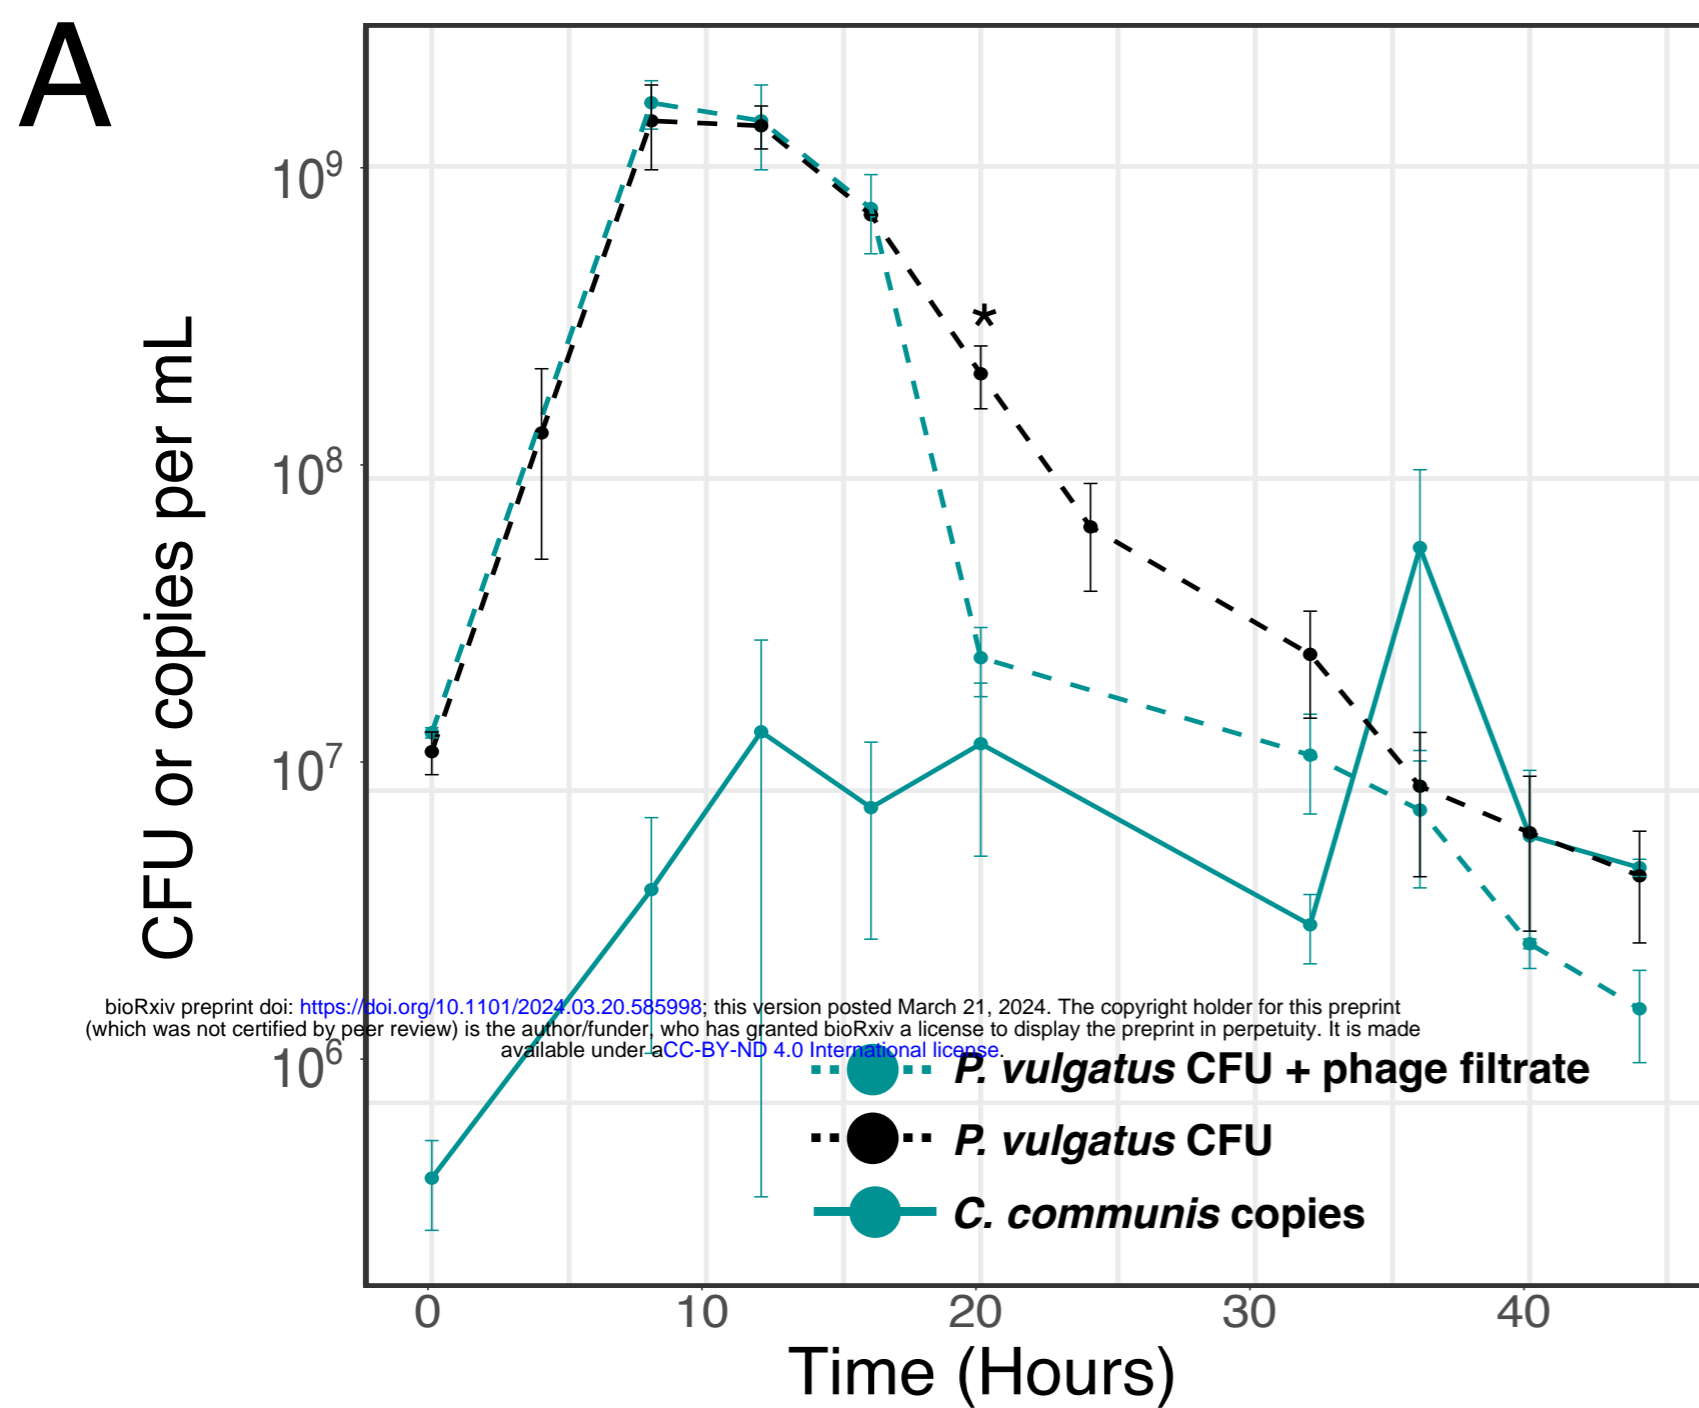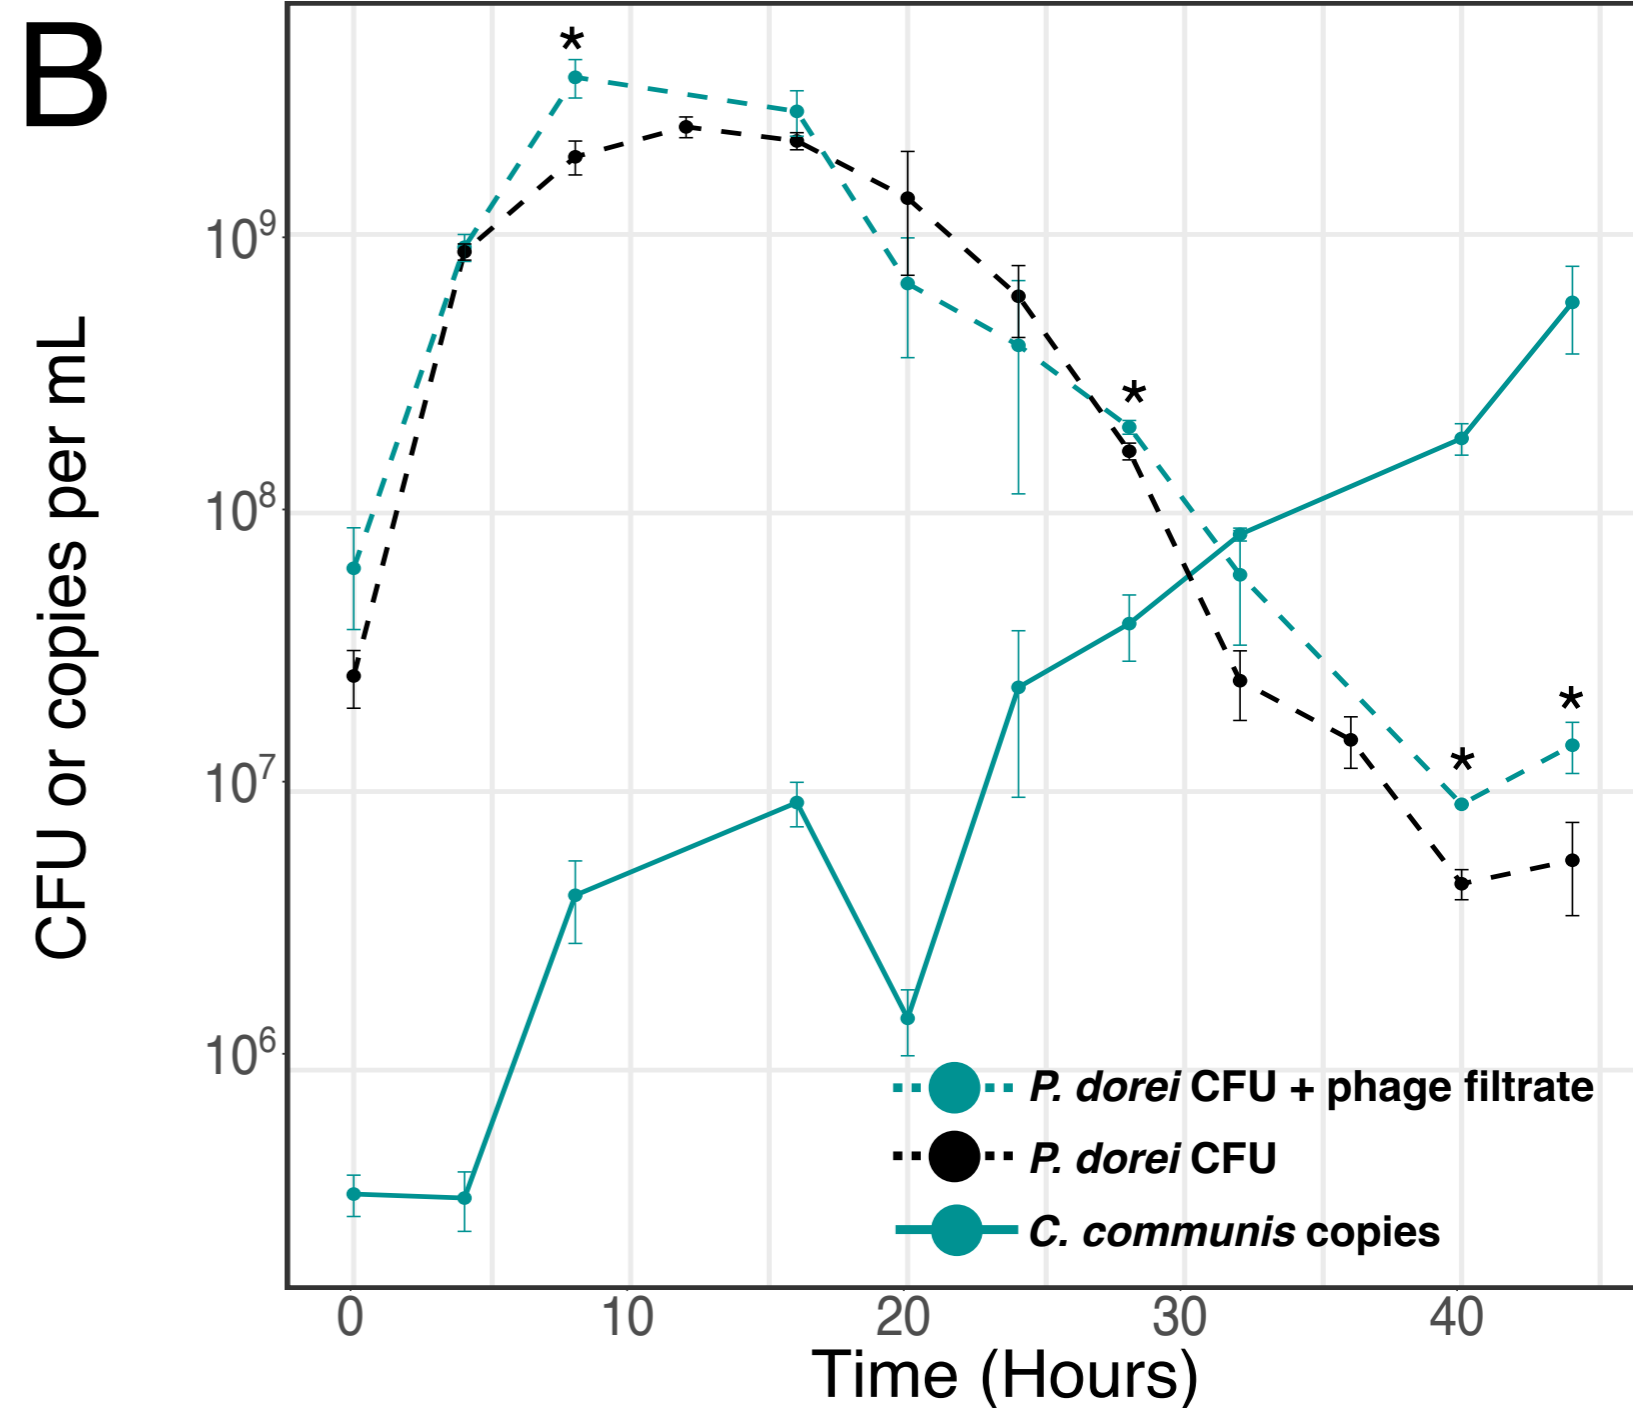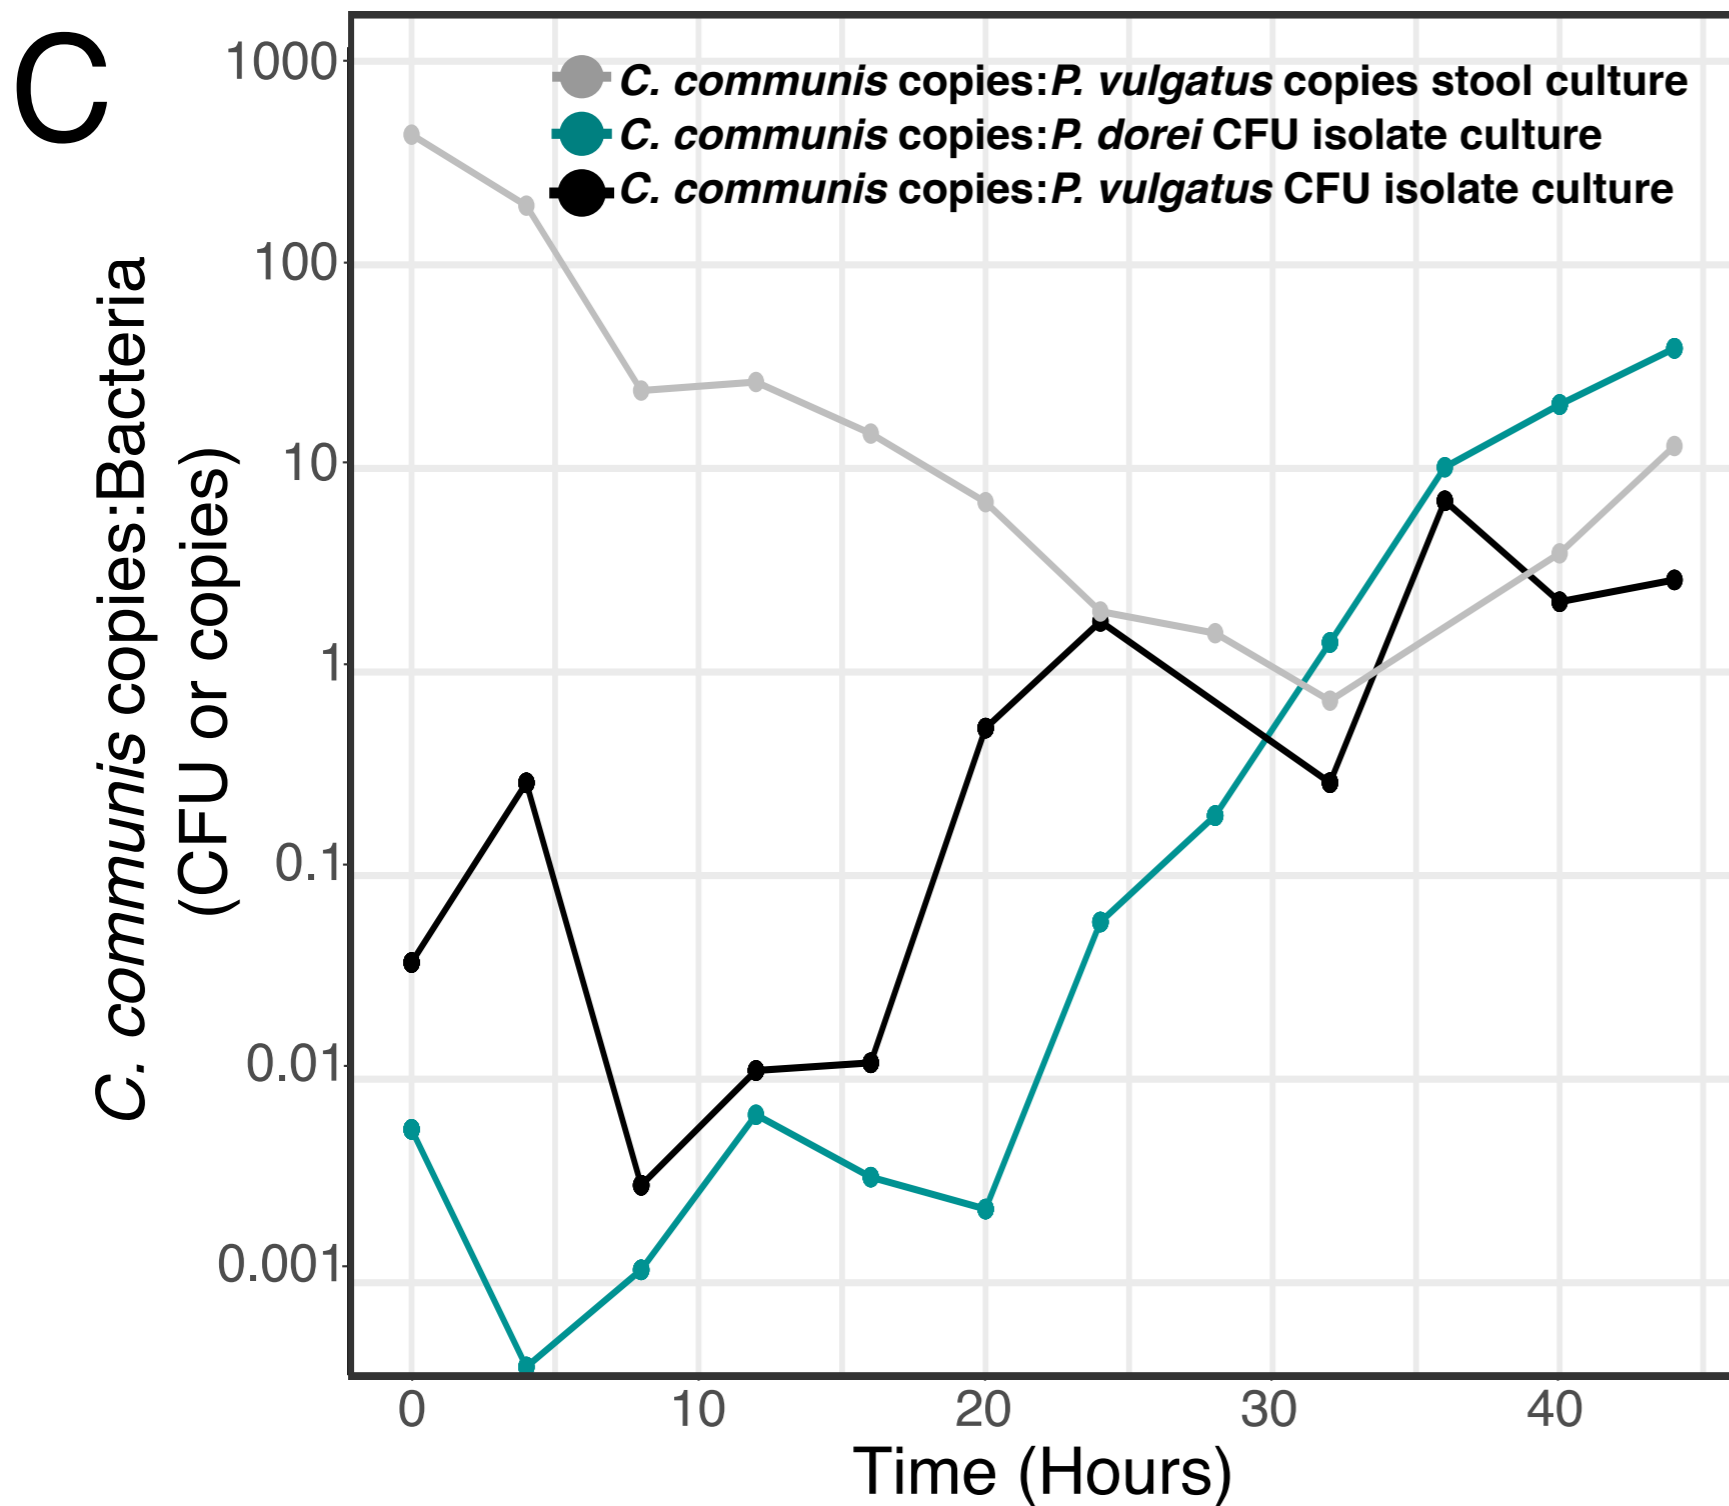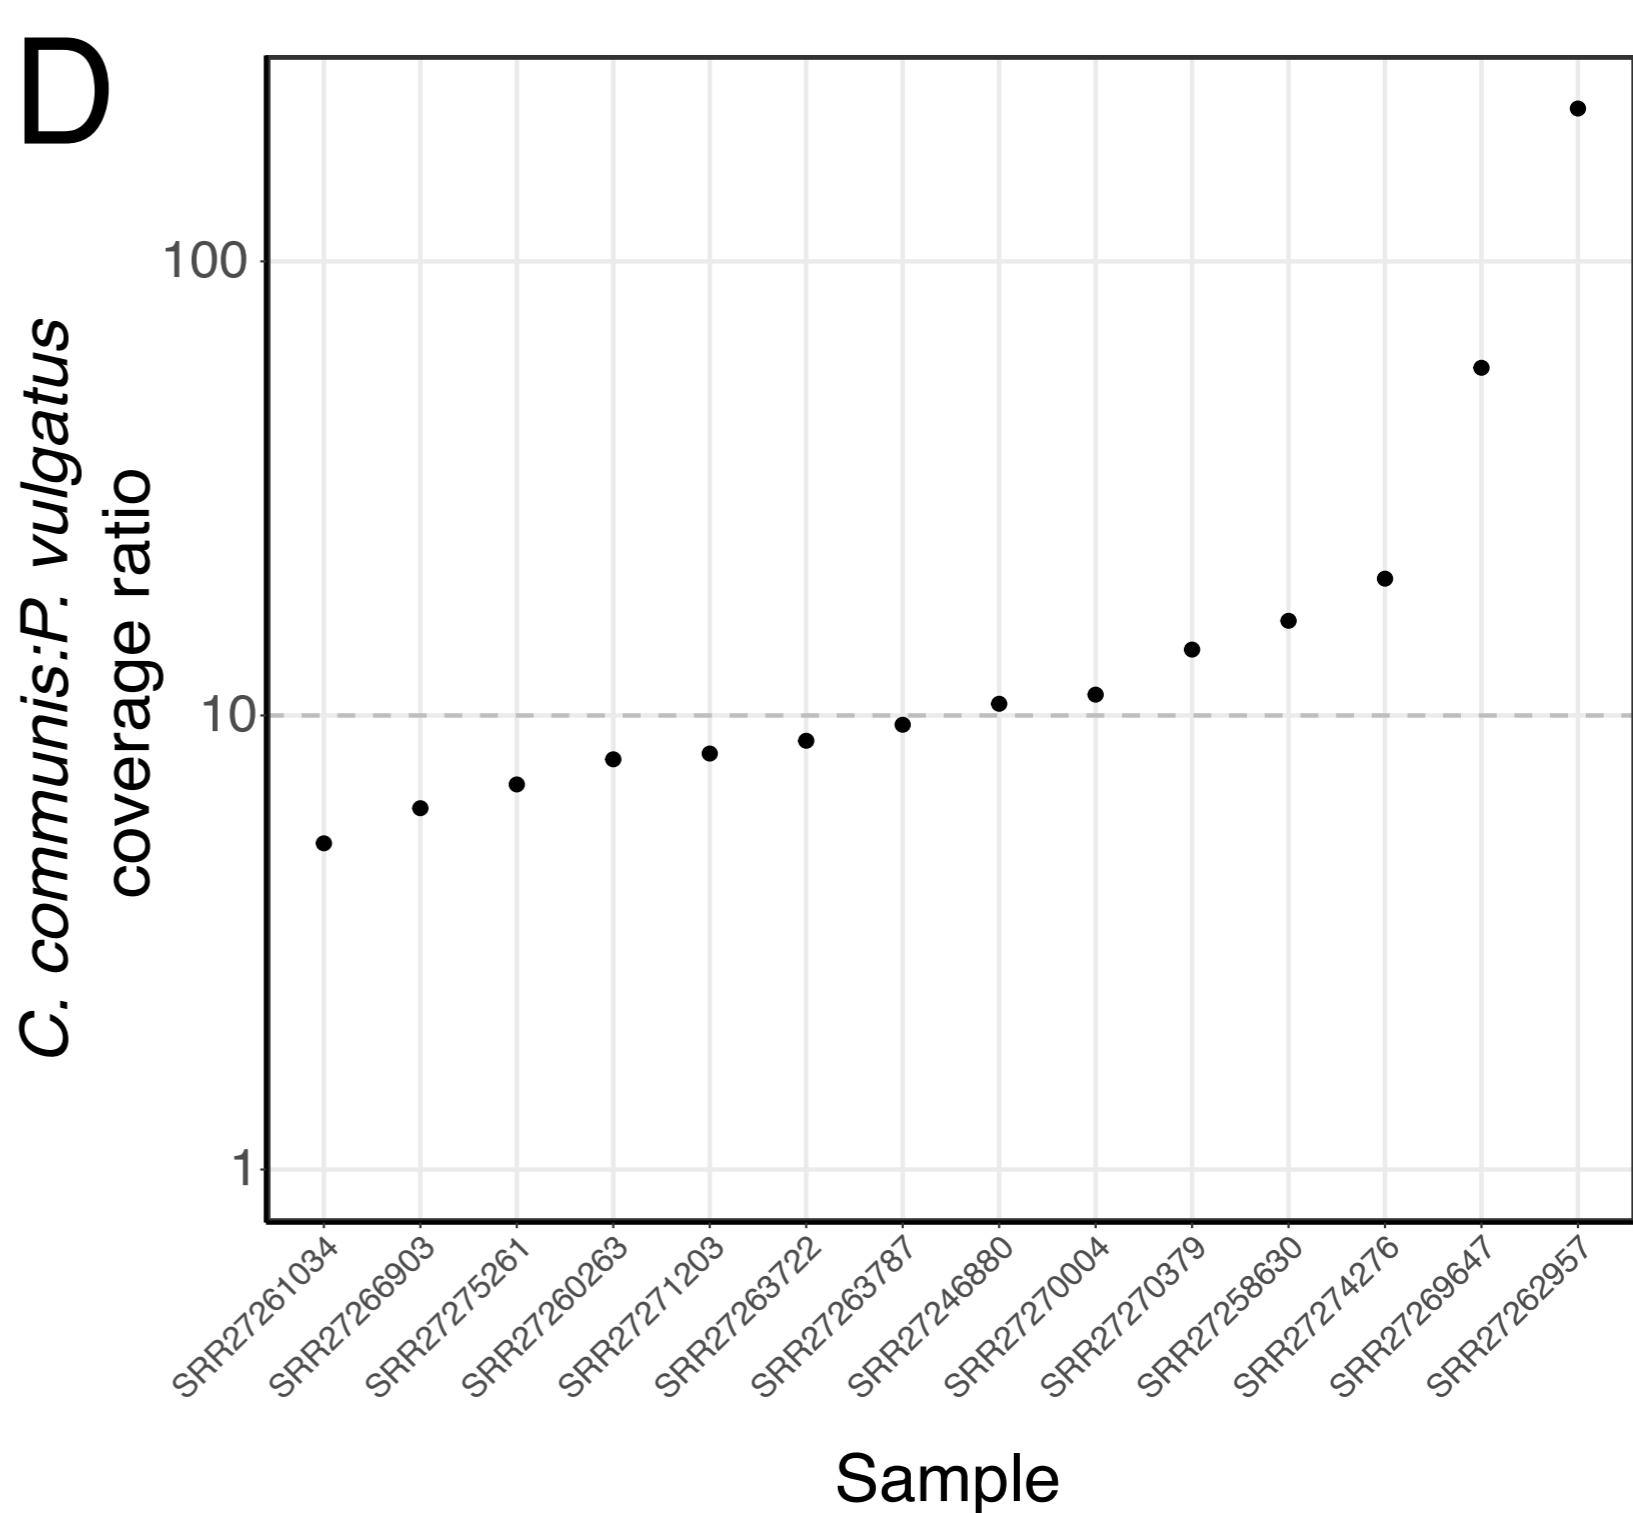

Source: https://www.biorxiv.org/content/10.1101/2024.03.20.585998.full.pdf
